# Supplementary material
Source: Research Square preprint supplement (doi:10.21203/rs.3.rs-8795967/v1)
Supplement: Supplementary file 1 [file 5a7f7def8ac142748b567ec6.xlsx]

## Sheet: Table S3
ASV	log2FC	negLog10Padj	Enriched Group	Significance	Regulation	padj
ASV10071	24.9941	19.6586	MC	Significant	Up	2.19493e-20
ASV10170	1.30883	0.101864	MC	Non-significant	Up	0.790926
ASV10202	-4.05582	0	MS	Non-significant	Down	1
ASV10236	-4.49949	0	MS	Non-significant	Down	1
ASV10259	-2.93983	0.283553	MS	Non-significant	Down	0.520532
ASV10265	-1.58159	0	MS	Non-significant	Down	1
ASV10278	-6.62968	1.11058	MS	Non-significant	Down	0.0775214
ASV1035	-2.75509	0.18737	MS	Non-significant	Down	0.649576
ASV10429	-6.76178	0	MS	Non-significant	Down	1
ASV10466	-0.216453	0.0184121	MS	Non-significant	Down	0.958491
ASV10476	-7.9447	1.13239	MS	Non-significant	Down	0.0737247
ASV10493	-8.0811	1.69739	MS	Significant	Down	0.0200728
ASV10586	-5.48167	0	MS	Non-significant	Down	1
ASV10616	-2.92887	0	MS	Non-significant	Down	1
ASV10625	5.35521	0.821084	MC	Non-significant	Up	0.150979
ASV10629	-2.21188	0	MS	Non-significant	Down	1
ASV10702	6.74922	1.64532	MC	Significant	Up	0.02263
ASV10733	-7.21939	0.973469	MS	Non-significant	Down	0.1063
ASV10760	23.4844	25.9911	MC	Significant	Up	1.02068e-26
ASV10806	-5.80216	0	MS	Non-significant	Down	1
ASV10822	-0.954337	0.0952044	MS	Non-significant	Down	0.803148
ASV10935	-6.23322	0	MS	Non-significant	Down	1
ASV10948	-5.12046	0	MS	Non-significant	Down	1
ASV10989	-5.6535	0	MS	Non-significant	Down	1
ASV11105	-6.99013	0.86975	MS	Non-significant	Down	0.134974
ASV11179	-6.51385	0	MS	Non-significant	Down	1
ASV11202	20.1172	12.9645	MC	Significant	Up	1.08519e-13
ASV11237	-2.87121	0	MS	Non-significant	Down	1
ASV11259	6.51984	1.74789	MC	Significant	Up	0.0178694
ASV11262	-2.45809	0	MS	Non-significant	Down	1
ASV11324	-4.71292	0	MS	Non-significant	Down	1
ASV11345	-2.40222	0	MS	Non-significant	Down	1
ASV11350	-2.13709	0	MS	Non-significant	Down	1
ASV11402	-5.4039	0	MS	Non-significant	Down	1
ASV11476	0.441194	0.0918102	MC	Non-significant	Up	0.80945
ASV11539	-0.638199	0.0503686	MS	Non-significant	Down	0.890495
ASV11629	-1.41231	0.119113	MS	Non-significant	Down	0.760129
ASV11631	-8.03554	1.36446	MS	Significant	Down	0.0432056
ASV11819	-4.3802	0	MS	Non-significant	Down	1
ASV11836	-0.704063	0	MS	Non-significant	Down	1
ASV11865	-6.25151	7.94651	MS	Significant	Down	1.13108e-08
ASV11871	7.48835	2.2581	MC	Significant	Up	0.0055195
ASV11919	1.24732	0.263027	MC	Non-significant	Up	0.545724
ASV11932	-2.23101	0.124486	MS	Non-significant	Down	0.750782
ASV11994	-0.961229	0.0952044	MS	Non-significant	Down	0.803148
ASV12011	-3.78762	0	MS	Non-significant	Down	1
ASV12028	-7.86925	0.973469	MS	Non-significant	Down	0.1063
ASV12059	2.79275	0.332534	MC	Non-significant	Up	0.465014
ASV12153	-9.07552	1.44088	MS	Significant	Down	0.0362345
ASV12158	-1.67016	0	MS	Non-significant	Down	1
ASV12167	-2.54496	0	MS	Non-significant	Down	1
ASV12237	-1.69122	0	MS	Non-significant	Down	1
ASV1225	-1.86926	0.350374	MS	Non-significant	Down	0.446299
ASV12263	-5.88216	0.77339	MS	Non-significant	Down	0.168504
ASV12278	-0.788772	0	MS	Non-significant	Down	1
ASV1230	-4.30372	0	MS	Non-significant	Down	1
ASV12308	-7.80524	1.74327	MS	Significant	Down	0.0180604
ASV12358	-4.11576	0.805637	MS	Non-significant	Down	0.156446
ASV12359	-2.9359	0	MS	Non-significant	Down	1
ASV1243	-0.911222	0.0687623	MS	Non-significant	Down	0.853567
ASV12430	21.8628	9.40039	MC	Significant	Up	3.97749e-10
ASV12460	-3.9695	0	MS	Non-significant	Down	1
ASV12483	-6.4186	0.837686	MS	Non-significant	Down	0.145316
ASV12527	-10.2119	1.69739	MS	Significant	Down	0.0200728
ASV12563	-5.17107	0	MS	Non-significant	Down	1
ASV12647	-5.83327	0	MS	Non-significant	Down	1
ASV12651	21.6361	16.5057	MC	Significant	Up	3.12071e-17
ASV12656	-3.37112	0	MS	Non-significant	Down	1
ASV12687	-3.30775	0	MS	Non-significant	Down	1
ASV12692	-0.384456	0	MS	Non-significant	Down	1
ASV12885	22.1025	16.1143	MC	Significant	Up	7.68518e-17
ASV12897	-4.11583	0	MS	Non-significant	Down	1
ASV12910	-3.92194	0	MS	Non-significant	Down	1
ASV12922	-1.35975	0.137329	MS	Non-significant	Down	0.728906
ASV12932	-4.09811	0	MS	Non-significant	Down	1
ASV13020	-3.62937	0	MS	Non-significant	Down	1
ASV13046	-4.05845	0	MS	Non-significant	Down	1
ASV13048	-3.73294	0	MS	Non-significant	Down	1
ASV13065	6.71068	1.3194	MC	Significant	Up	0.0479297
ASV13084	-2.66183	0.720478	MS	Non-significant	Down	0.190337
ASV13126	-6.43378	0	MS	Non-significant	Down	1
ASV13170	-6.99714	0.851231	MS	Non-significant	Down	0.140854
ASV13205	-3.66817	0	MS	Non-significant	Down	1
ASV13238	7.35145	1.99414	MC	Significant	Up	0.0101357
ASV13239	6.85707	1.53326	MC	Significant	Up	0.0292916
ASV13247	6.13498	1.04621	MC	Non-significant	Up	0.0899066
ASV1327	-3.84337	0.332534	MS	Non-significant	Down	0.465014
ASV13403	-2.58186	0	MS	Non-significant	Down	1
ASV13463	-1.44304	0.159127	MS	Non-significant	Down	0.693224
ASV13474	-4.56585	0	MS	Non-significant	Down	1
ASV13589	-0.10326	0.0163242	MS	Non-significant	Down	0.96311
ASV13592	-7.20675	1.84814	MS	Significant	Down	0.0141861
ASV13698	-5.23838	0	MS	Non-significant	Down	1
ASV13715	-5.50559	0	MS	Non-significant	Down	1
ASV13719	-5.99344	0.816941	MS	Non-significant	Down	0.152426
ASV13721	-2.83094	0.322257	MS	Non-significant	Down	0.47615
ASV13730	1.07856	0.0952044	MC	Non-significant	Up	0.803148
ASV13732	-5.17885	0	MS	Non-significant	Down	1
ASV13735	-6.88909	0.969407	MS	Non-significant	Down	0.107298
ASV1378	-4.99444	0	MS	Non-significant	Down	1
ASV13793	1.60114	0.124486	MC	Non-significant	Up	0.750782
ASV13811	-6.80479	1.04288	MS	Non-significant	Down	0.090599
ASV13841	-5.89592	0	MS	Non-significant	Down	1
ASV13880	7.91377	4.42415	MC	Significant	Up	3.76574e-05
ASV13918	-5.20788	0	MS	Non-significant	Down	1
ASV13931	-3.88869	0	MS	Non-significant	Down	1
ASV13976	-2.16633	0	MS	Non-significant	Down	1
ASV13990	0.701149	0.0952044	MC	Non-significant	Up	0.803148
ASV13998	-4.59758	0	MS	Non-significant	Down	1
ASV14057	6.26497	1.05271	MC	Non-significant	Up	0.0885701
ASV1407	-4.66944	0	MS	Non-significant	Down	1
ASV14098	-2.276	0	MS	Non-significant	Down	1
ASV1410	-4.42347	0	MS	Non-significant	Down	1
ASV14250	29.0253	63.0085	MC	Significant	Up	9.80522e-64
ASV14272	-2.232	0	MS	Non-significant	Down	1
ASV14295	-3.75602	0	MS	Non-significant	Down	1
ASV14347	-2.76119	0	MS	Non-significant	Down	1
ASV14372	-4.74891	0.419828	MS	Non-significant	Down	0.38034
ASV14393	-4.32379	0	MS	Non-significant	Down	1
ASV1445	-8.26663	1.74327	MS	Significant	Down	0.0180604
ASV14451	-5.17147	0	MS	Non-significant	Down	1
ASV14478	-4.65964	0	MS	Non-significant	Down	1
ASV14511	5.81165	0.987177	MC	Non-significant	Up	0.102997
ASV1455	-5.30522	0	MS	Non-significant	Down	1
ASV14577	23.591	24.234	MC	Significant	Up	5.83388e-25
ASV14601	22.0481	18.7537	MC	Significant	Up	1.76303e-19
ASV14615	-3.54035	0.419828	MS	Non-significant	Down	0.38034
ASV14635	5.93942	1.08077	MC	Non-significant	Up	0.0830285
ASV14648	-1.05823	0	MS	Non-significant	Down	1
ASV14678	-7.95695	0.801015	MS	Non-significant	Down	0.158119
ASV14679	-2.64365	0.336556	MS	Non-significant	Down	0.460727
ASV14683	-5.57356	1.04288	MS	Non-significant	Down	0.090599
ASV14704	-2.99563	0	MS	Non-significant	Down	1
ASV1475	-5.88989	0	MS	Non-significant	Down	1
ASV14979	5.54872	1.74327	MC	Significant	Up	0.0180604
ASV14997	-0.85592	0	MS	Non-significant	Down	1
ASV15091	11.564	12.0583	MC	Significant	Up	8.74328e-13
ASV15093	-4.70892	0	MS	Non-significant	Down	1
ASV15127	-0.688412	0	MS	Non-significant	Down	1
ASV15144	9.9845	8.37888	MC	Significant	Up	4.17941e-09
ASV15159	-5.4093	0	MS	Non-significant	Down	1
ASV15235	-2.9173	0	MS	Non-significant	Down	1
ASV15281	-3.43645	0	MS	Non-significant	Down	1
ASV15524	-4.22412	0	MS	Non-significant	Down	1
ASV15596	-5.19333	0	MS	Non-significant	Down	1
ASV15628	-5.88096	0	MS	Non-significant	Down	1
ASV15664	-5.56629	0	MS	Non-significant	Down	1
ASV15679	-2.99206	0	MS	Non-significant	Down	1
ASV15691	-2.46874	0	MS	Non-significant	Down	1
ASV15758	-0.649837	0	MS	Non-significant	Down	1
ASV15850	-2.23561	0	MS	Non-significant	Down	1
ASV15860	-5.0657	0	MS	Non-significant	Down	1
ASV15951	-3.07728	0	MS	Non-significant	Down	1
ASV1599	-5.47478	0	MS	Non-significant	Down	1
ASV16067	-5.41345	0	MS	Non-significant	Down	1
ASV16088	-6.21047	0	MS	Non-significant	Down	1
ASV161	-2.13622	0.251904	MS	Non-significant	Down	0.559882
ASV16140	1.24252	0.127317	MC	Non-significant	Up	0.745904
ASV16159	-2.85187	0	MS	Non-significant	Down	1
ASV16237	0.0242169	0.00236413	MC	Non-significant	Up	0.994571
ASV16250	-7.70995	1.04288	MS	Non-significant	Down	0.090599
ASV16327	-1.86173	0	MS	Non-significant	Down	1
ASV16443	-3.15692	0	MS	Non-significant	Down	1
ASV16467	-0.830583	0	MS	Non-significant	Down	1
ASV16484	-3.10076	0	MS	Non-significant	Down	1
ASV16507	-2.2799	0	MS	Non-significant	Down	1
ASV16516	-7.15302	0.969407	MS	Non-significant	Down	0.107298
ASV1652	22.9548	11.4133	MC	Significant	Up	3.86056e-12
ASV16582	-3.31396	0	MS	Non-significant	Down	1
ASV16608	-7.97114	1.126	MS	Non-significant	Down	0.0748164
ASV16621	-3.8624	0	MS	Non-significant	Down	1
ASV16757	-5.82972	0	MS	Non-significant	Down	1
ASV16784	-2.01421	0	MS	Non-significant	Down	1
ASV16848	-2.77978	0	MS	Non-significant	Down	1
ASV16898	-2.11162	0	MS	Non-significant	Down	1
ASV17056	-1.90785	0	MS	Non-significant	Down	1
ASV17123	-5.53676	0	MS	Non-significant	Down	1
ASV17207	-3.46593	0	MS	Non-significant	Down	1
ASV17208	-2.38588	0.419506	MS	Non-significant	Down	0.380622
ASV17217	-3.0155	0	MS	Non-significant	Down	1
ASV17248	-4.07524	0	MS	Non-significant	Down	1
ASV17260	5.73576	1.05271	MC	Non-significant	Up	0.0885701
ASV17302	6.77186	1.21055	MC	Non-significant	Up	0.0615813
ASV17340	-8.12669	1.04288	MS	Non-significant	Down	0.090599
ASV1738	-5.9372	0	MS	Non-significant	Down	1
ASV17430	6.48532	1.58569	MC	Significant	Up	0.0259605
ASV17496	-5.6107	0	MS	Non-significant	Down	1
ASV17497	-4.39878	0	MS	Non-significant	Down	1
ASV17506	-1.68175	0	MS	Non-significant	Down	1
ASV17517	-5.46481	0	MS	Non-significant	Down	1
ASV17529	3.94667	1.04288	MC	Non-significant	Up	0.090599
ASV17552	-0.162785	0.0130414	MS	Non-significant	Down	0.970417
ASV17582	-5.30935	0	MS	Non-significant	Down	1
ASV17586	8.29276	4.11161	MC	Significant	Up	7.73378e-05
ASV17592	-3.22418	0	MS	Non-significant	Down	1
ASV17753	-6.82897	0.816941	MS	Non-significant	Down	0.152426
ASV17786	22.6585	24.7192	MC	Significant	Up	1.90903e-25
ASV17824	-3.37738	0	MS	Non-significant	Down	1
ASV17827	-7.44804	0.973824	MS	Non-significant	Down	0.106213
ASV18001	-6.16999	0	MS	Non-significant	Down	1
ASV18024	-7.45875	0.778758	MS	Non-significant	Down	0.166434
ASV18031	22.3162	12.0466	MC	Significant	Up	8.98188e-13
ASV18093	-6.04428	0.662797	MS	Non-significant	Down	0.217372
ASV1812	-5.65669	0	MS	Non-significant	Down	1
ASV18125	1.94909	0.39821	MC	Non-significant	Up	0.399752
ASV18252	0.0502102	0.00395674	MC	Non-significant	Up	0.990931
ASV18295	-2.90698	0	MS	Non-significant	Down	1
ASV183	0.72283	0.0952044	MC	Non-significant	Up	0.803148
ASV18317	-3.02	0	MS	Non-significant	Down	1
ASV18352	2.60271	0.664309	MC	Non-significant	Up	0.216616
ASV18374	0.206943	0.0174086	MC	Non-significant	Up	0.960708
ASV18474	23.7101	33.1954	MC	Significant	Up	6.37631e-34
ASV18477	1.55093	0.53703	MC	Non-significant	Up	0.290382
ASV18487	-1.23258	0	MS	Non-significant	Down	1
ASV18494	22.1741	16.4457	MC	Significant	Up	3.58342e-17
ASV18502	-0.866194	0.0952044	MS	Non-significant	Down	0.803148
ASV18554	-4.54048	0	MS	Non-significant	Down	1
ASV18566	-3.47016	0	MS	Non-significant	Down	1
ASV18590	-4.32762	0	MS	Non-significant	Down	1
ASV18619	-0.534456	0	MS	Non-significant	Down	1
ASV18634	-3.01147	0	MS	Non-significant	Down	1
ASV18717	-3.70268	0.799223	MS	Non-significant	Down	0.158773
ASV18736	-2.38367	0	MS	Non-significant	Down	1
ASV18831	-5.15042	0	MS	Non-significant	Down	1
ASV18840	6.20877	1.4383	MC	Significant	Up	0.0364502
ASV18858	4.03457	0.940151	MC	Non-significant	Up	0.114775
ASV18879	-5.55808	0	MS	Non-significant	Down	1
ASV18906	-3.91408	0	MS	Non-significant	Down	1
ASV19082	2.64324	0.5515	MC	Non-significant	Up	0.280867
ASV19114	0.245335	0.0232237	MC	Non-significant	Up	0.94793
ASV19129	-3.79856	0	MS	Non-significant	Down	1
ASV19165	-8.46332	1.4845	MS	Significant	Down	0.032772
ASV19166	23.5216	21.086	MC	Significant	Up	8.20275e-22
ASV1922	-3.34188	0.306987	MS	Non-significant	Down	0.493189
ASV19232	-1.36567	0.15432	MS	Non-significant	Down	0.700938
ASV19261	-7.09137	1.04288	MS	Non-significant	Down	0.090599
ASV1932	-4.58737	0	MS	Non-significant	Down	1
ASV19334	-5.20864	0.608721	MS	Non-significant	Down	0.246195
ASV19354	1.29663	0.526515	MC	Non-significant	Up	0.297499
ASV19395	-2.57287	0	MS	Non-significant	Down	1
ASV19444	-6.48375	0	MS	Non-significant	Down	1
ASV195	-4.57584	0	MS	Non-significant	Down	1
ASV1954	-1.46291	0	MS	Non-significant	Down	1
ASV19544	-4.83252	0	MS	Non-significant	Down	1
ASV19551	-7.4319	0.969407	MS	Non-significant	Down	0.107298
ASV1957	-6.31056	0	MS	Non-significant	Down	1
ASV19617	-1.99237	0	MS	Non-significant	Down	1
ASV19658	-3.78443	0	MS	Non-significant	Down	1
ASV19690	-0.914065	0.102304	MS	Non-significant	Down	0.790125
ASV19780	-4.25582	0	MS	Non-significant	Down	1
ASV19781	6.83513	1.32324	MC	Significant	Up	0.0475071
ASV19809	-2.47667	0	MS	Non-significant	Down	1
ASV19843	-2.87124	0.227934	MS	Non-significant	Down	0.591652
ASV19855	2.37035	0.799301	MC	Non-significant	Up	0.158745
ASV19916	-5.3968	0	MS	Non-significant	Down	1
ASV19942	-5.22934	0	MS	Non-significant	Down	1
ASV19954	-4.20012	0	MS	Non-significant	Down	1
ASV19955	-7.87277	1.05271	MS	Non-significant	Down	0.0885701
ASV19992	-3.80827	0	MS	Non-significant	Down	1
ASV20180	-1.05823	0	MS	Non-significant	Down	1
ASV20201	23.1447	19.6586	MC	Significant	Up	2.19493e-20
ASV20215	-3.32459	0	MS	Non-significant	Down	1
ASV20232	-4.43268	0	MS	Non-significant	Down	1
ASV20283	-4.45648	0	MS	Non-significant	Down	1
ASV20364	26.8346	46.6006	MC	Significant	Up	2.50822e-47
ASV20476	-4.12084	0	MS	Non-significant	Down	1
ASV20490	11.7484	17.0274	MC	Significant	Up	9.38759e-18
ASV20495	-2.3573	0.356235	MS	Non-significant	Down	0.440316
ASV20560	-2.40168	0	MS	Non-significant	Down	1
ASV2072	-2.81039	0	MS	Non-significant	Down	1
ASV20735	-2.37663	0	MS	Non-significant	Down	1
ASV20764	-5.73935	0	MS	Non-significant	Down	1
ASV20807	-4.06987	0	MS	Non-significant	Down	1
ASV2085	7.42762	2.6409	MC	Significant	Up	0.00228611
ASV20886	6.40944	1.52348	MC	Significant	Up	0.0299583
ASV21037	-0.415118	0.0232237	MS	Non-significant	Down	0.94793
ASV21070	-2.62465	0	MS	Non-significant	Down	1
ASV21142	-3.46678	0	MS	Non-significant	Down	1
ASV21184	-0.755338	0	MS	Non-significant	Down	1
ASV21204	6.95384	3.33895	MC	Significant	Up	0.000458195
ASV21249	-7.02803	0.816941	MS	Non-significant	Down	0.152426
ASV21261	18.2524	7.08438	MC	Significant	Up	8.2341e-08
ASV21289	-7.37768	1.1223	MS	Non-significant	Down	0.075457
ASV21344	-6.77799	2.13222	MS	Significant	Down	0.00737538
ASV21393	-4.90566	0	MS	Non-significant	Down	1
ASV21419	-5.36834	0	MS	Non-significant	Down	1
ASV21470	7.57438	2.71316	MC	Significant	Up	0.00193571
ASV21559	-6.28087	0	MS	Non-significant	Down	1
ASV21573	-5.074	0	MS	Non-significant	Down	1
ASV21592	3.55237	0.816941	MC	Non-significant	Up	0.152426
ASV21662	-5.84442	0.720478	MS	Non-significant	Down	0.190337
ASV21689	-5.70928	0	MS	Non-significant	Down	1
ASV21702	-5.18371	0	MS	Non-significant	Down	1
ASV21726	-2.65802	0.332534	MS	Non-significant	Down	0.465014
ASV21738	-2.66941	0	MS	Non-significant	Down	1
ASV21769	-3.97334	0	MS	Non-significant	Down	1
ASV21782	-5.66554	0	MS	Non-significant	Down	1
ASV21807	-4.92901	0	MS	Non-significant	Down	1
ASV21813	-6.90014	0.969407	MS	Non-significant	Down	0.107298
ASV21868	-4.94411	0	MS	Non-significant	Down	1
ASV21907	21.5735	14.2741	MC	Significant	Up	5.32024e-15
ASV21933	-5.27482	0	MS	Non-significant	Down	1
ASV21936	-1.45181	0.120805	MS	Non-significant	Down	0.757173
ASV21966	-6.62721	1.20295	MS	Non-significant	Down	0.0626682
ASV21991	7.03794	1.52011	MC	Significant	Up	0.0301921
ASV22010	-3.84042	0	MS	Non-significant	Down	1
ASV22253	-3.6882	0	MS	Non-significant	Down	1
ASV22296	-2.89606	0	MS	Non-significant	Down	1
ASV22304	-2.30851	0.184472	MS	Non-significant	Down	0.653925
ASV22323	-2.50146	0	MS	Non-significant	Down	1
ASV22394	-2.12866	0	MS	Non-significant	Down	1
ASV22451	-3.41546	0.19645	MS	Non-significant	Down	0.636136
ASV22560	-6.25794	0	MS	Non-significant	Down	1
ASV22590	-4.40728	0	MS	Non-significant	Down	1
ASV22633	-3.78707	0	MS	Non-significant	Down	1
ASV22647	-5.26493	0	MS	Non-significant	Down	1
ASV2271	-5.38177	0	MS	Non-significant	Down	1
ASV22712	18.0267	16.7877	MC	Significant	Up	1.63041e-17
ASV22735	-2.64017	0	MS	Non-significant	Down	1
ASV22767	-5.40559	0	MS	Non-significant	Down	1
ASV22815	-5.4038	0	MS	Non-significant	Down	1
ASV2283	-2.61686	0	MS	Non-significant	Down	1
ASV22859	5.95027	1.11058	MC	Non-significant	Up	0.0775214
ASV22869	-4.64599	0	MS	Non-significant	Down	1
ASV22886	-3.95291	0	MS	Non-significant	Down	1
ASV22893	-5.5129	0	MS	Non-significant	Down	1
ASV22923	-5.9807	0	MS	Non-significant	Down	1
ASV22977	-6.27002	0	MS	Non-significant	Down	1
ASV23125	-5.38201	0	MS	Non-significant	Down	1
ASV23143	-6.86003	0.998907	MS	Non-significant	Down	0.100252
ASV23221	5.37935	0.998728	MC	Non-significant	Up	0.100293
ASV23257	6.73791	1.26222	MC	Non-significant	Up	0.0546738
ASV23306	-4.46087	0	MS	Non-significant	Down	1
ASV23351	-1.64369	0.231905	MS	Non-significant	Down	0.586266
ASV23373	-5.36481	0	MS	Non-significant	Down	1
ASV23404	6.51586	1.55553	MC	Significant	Up	0.0278273
ASV23422	-2.87121	0	MS	Non-significant	Down	1
ASV23440	-3.94665	0	MS	Non-significant	Down	1
ASV23449	-3.76798	0	MS	Non-significant	Down	1
ASV23456	-0.971073	0.124486	MS	Non-significant	Down	0.750782
ASV23566	-0.999276	0	MS	Non-significant	Down	1
ASV23732	24.3499	13.34	MC	Significant	Up	4.57074e-14
ASV23785	-3.53854	0	MS	Non-significant	Down	1
ASV23811	-1.99945	0	MS	Non-significant	Down	1
ASV2393	-4.16557	0	MS	Non-significant	Down	1
ASV23947	-6.87539	1.00203	MS	Non-significant	Down	0.0995338
ASV24056	-0.486521	0	MS	Non-significant	Down	1
ASV24104	-2.08944	0	MS	Non-significant	Down	1
ASV24133	21.3125	30.4076	MC	Significant	Up	3.91239e-31
ASV24173	-3.36416	0	MS	Non-significant	Down	1
ASV2476	-5.5937	0	MS	Non-significant	Down	1
ASV2563	-7.40812	1.1223	MS	Non-significant	Down	0.075457
ASV259	-5.14614	0.747672	MS	Non-significant	Down	0.178784
ASV2695	-7.47086	1.04288	MS	Non-significant	Down	0.090599
ASV2724	-3.88286	0	MS	Non-significant	Down	1
ASV2755	-2.80062	0	MS	Non-significant	Down	1
ASV28	-5.04326	0	MS	Non-significant	Down	1
ASV2823	-3.46025	0	MS	Non-significant	Down	1
ASV2857	-6.42771	0	MS	Non-significant	Down	1
ASV2946	-2.7797	0	MS	Non-significant	Down	1
ASV2984	-4.6183	0	MS	Non-significant	Down	1
ASV3080	-5.61938	0	MS	Non-significant	Down	1
ASV3132	-2.92044	0	MS	Non-significant	Down	1
ASV3136	-5.06686	0	MS	Non-significant	Down	1
ASV3280	-6.64252	0.888468	MS	Non-significant	Down	0.12928
ASV333	5.99311	2.70803	MC	Significant	Up	0.0019587
ASV3337	-4.84423	0	MS	Non-significant	Down	1
ASV3427	-4.99243	0	MS	Non-significant	Down	1
ASV3429	-3.22134	0	MS	Non-significant	Down	1
ASV346	-6.63195	0	MS	Non-significant	Down	1
ASV3481	-4.23688	1.17135	MS	Non-significant	Down	0.0673983
ASV3493	26.3828	46.666	MC	Significant	Up	2.15789e-47
ASV3530	-2.88472	0	MS	Non-significant	Down	1
ASV3588	1.72143	0	MC	Non-significant	Up	1
ASV3638	-3.01681	0	MS	Non-significant	Down	1
ASV3675	5.6379	1.05271	MC	Non-significant	Up	0.0885701
ASV3701	-4.88166	0	MS	Non-significant	Down	1
ASV3723	-2.17919	0	MS	Non-significant	Down	1
ASV3813	-2.78431	0.263027	MS	Non-significant	Down	0.545724
ASV3964	-6.58691	0.875457	MS	Non-significant	Down	0.133212
ASV3975	-5.34222	0.925036	MS	Non-significant	Down	0.11884
ASV4005	-1.37285	0	MS	Non-significant	Down	1
ASV4024	-5.94998	0	MS	Non-significant	Down	1
ASV4044	-2.39504	0	MS	Non-significant	Down	1
ASV4094	2.26019	0.359283	MC	Non-significant	Up	0.437237
ASV4142	-1.68958	0.124486	MS	Non-significant	Down	0.750782
ASV4218	-4.61589	0	MS	Non-significant	Down	1
ASV4229	-2.37373	0	MS	Non-significant	Down	1
ASV4258	-5.64312	0	MS	Non-significant	Down	1
ASV4332	22.3511	20.4834	MC	Significant	Up	3.28572e-21
ASV437	-7.29431	1.17135	MS	Non-significant	Down	0.0673983
ASV4406	-2.89485	0	MS	Non-significant	Down	1
ASV4456	-3.49112	0	MS	Non-significant	Down	1
ASV4475	-6.08287	0.652977	MS	Non-significant	Down	0.222343
ASV448	23.5497	27.6962	MC	Significant	Up	2.01287e-28
ASV4556	5.9103	1.00203	MC	Non-significant	Up	0.0995338
ASV4631	7.24507	4.15032	MC	Significant	Up	7.07426e-05
ASV4641	-2.82134	0.575003	MS	Non-significant	Down	0.266071
ASV4720	-4.19817	0	MS	Non-significant	Down	1
ASV473	-4.31611	0	MS	Non-significant	Down	1
ASV4769	-5.00966	0	MS	Non-significant	Down	1
ASV4812	-6.0574	0	MS	Non-significant	Down	1
ASV4823	-6.23584	0	MS	Non-significant	Down	1
ASV483	-4.70423	0.608721	MS	Non-significant	Down	0.246195
ASV4845	-3.7002	0	MS	Non-significant	Down	1
ASV4891	-1.16535	0	MS	Non-significant	Down	1
ASV4935	-4.70085	0	MS	Non-significant	Down	1
ASV5080	-3.61306	0	MS	Non-significant	Down	1
ASV5099	-7.76415	1.02842	MS	Non-significant	Down	0.0936656
ASV5298	-3.19445	0	MS	Non-significant	Down	1
ASV5392	-4.3224	0	MS	Non-significant	Down	1
ASV5479	-3.06335	0	MS	Non-significant	Down	1
ASV5485	-4.31247	0	MS	Non-significant	Down	1
ASV5507	-3.45388	0	MS	Non-significant	Down	1
ASV5573	-4.23848	0	MS	Non-significant	Down	1
ASV5588	-1.48351	0	MS	Non-significant	Down	1
ASV5644	22.8187	10.72	MC	Significant	Up	1.90543e-11
ASV5657	-3.41068	0.157615	MS	Non-significant	Down	0.695641
ASV5660	-4.3657	0	MS	Non-significant	Down	1
ASV5725	-4.55824	0.53703	MS	Non-significant	Down	0.290382
ASV5736	-2.76332	0	MS	Non-significant	Down	1
ASV5822	-3.7761	0	MS	Non-significant	Down	1
ASV5835	-5.80003	0	MS	Non-significant	Down	1
ASV5876	-6.45014	0	MS	Non-significant	Down	1
ASV5881	-3.24885	0	MS	Non-significant	Down	1
ASV6028	-5.71337	0	MS	Non-significant	Down	1
ASV6048	-4.95512	0	MS	Non-significant	Down	1
ASV6053	2.85368	1.19553	MC	Non-significant	Up	0.0637486
ASV6090	-5.0636	0	MS	Non-significant	Down	1
ASV6100	-0.338207	0.0163242	MS	Non-significant	Down	0.96311
ASV6107	-4.79607	0	MS	Non-significant	Down	1
ASV6132	-8.10038	0.925036	MS	Non-significant	Down	0.11884
ASV6136	-2.41941	0	MS	Non-significant	Down	1
ASV6158	-5.79465	0.875654	MS	Non-significant	Down	0.133151
ASV6176	-5.27444	0	MS	Non-significant	Down	1
ASV6189	27.6706	38.9906	MC	Significant	Up	1.02193e-39
ASV621	-4.983	0	MS	Non-significant	Down	1
ASV6233	-3.95302	0	MS	Non-significant	Down	1
ASV6266	-5.75904	0	MS	Non-significant	Down	1
ASV627	-0.610453	0	MS	Non-significant	Down	1
ASV6283	-4.07178	0	MS	Non-significant	Down	1
ASV6342	1.57211	0.305506	MC	Non-significant	Up	0.494874
ASV6395	-6.42252	0	MS	Non-significant	Down	1
ASV6425	-7.0503	1.11058	MS	Non-significant	Down	0.0775214
ASV6446	-1.32052	0	MS	Non-significant	Down	1
ASV646	-3.88479	0	MS	Non-significant	Down	1
ASV6461	-5.68365	0.668214	MS	Non-significant	Down	0.214677
ASV6478	3.24482	0.616588	MC	Non-significant	Up	0.241775
ASV6495	22.0982	19.8644	MC	Significant	Up	1.36646e-20
ASV651	-3.04106	0	MS	Non-significant	Down	1
ASV652	-5.62141	0	MS	Non-significant	Down	1
ASV6585	-6.64551	0.900254	MS	Non-significant	Down	0.125819
ASV6605	-3.83383	0	MS	Non-significant	Down	1
ASV6621	-3.62807	0	MS	Non-significant	Down	1
ASV6781	-4.28419	0.421357	MS	Non-significant	Down	0.379003
ASV683	-3.5247	0	MS	Non-significant	Down	1
ASV687	7.81959	2.64192	MC	Significant	Up	0.00228076
ASV6901	-6.53515	0	MS	Non-significant	Down	1
ASV6943	-3.12812	0	MS	Non-significant	Down	1
ASV6995	-0.929393	0	MS	Non-significant	Down	1
ASV6996	-6.88562	0	MS	Non-significant	Down	1
ASV700	-4.15014	0	MS	Non-significant	Down	1
ASV7058	0.883884	0.124486	MC	Non-significant	Up	0.750782
ASV7138	-4.52007	0	MS	Non-significant	Down	1
ASV7197	-3.00864	0	MS	Non-significant	Down	1
ASV7211	-1.9127	0	MS	Non-significant	Down	1
ASV722	-6.95913	1.04288	MS	Non-significant	Down	0.090599
ASV7239	-5.85549	0	MS	Non-significant	Down	1
ASV7295	-6.29851	0.941773	MS	Non-significant	Down	0.114348
ASV7300	-7.28499	1.02842	MS	Non-significant	Down	0.0936656
ASV7326	-4.71453	0	MS	Non-significant	Down	1
ASV7401	-2.6809	0	MS	Non-significant	Down	1
ASV7458	5.92433	1.00203	MC	Non-significant	Up	0.0995338
ASV7506	-1.03582	0	MS	Non-significant	Down	1
ASV7558	-5.51571	0.662797	MS	Non-significant	Down	0.217372
ASV7571	-5.77302	0.84629	MS	Non-significant	Down	0.142465
ASV7572	-4.37662	0	MS	Non-significant	Down	1
ASV7635	-2.48219	0.248946	MS	Non-significant	Down	0.563708
ASV7708	-1.53221	0.124486	MS	Non-significant	Down	0.750782
ASV7754	2.33133	0.231905	MC	Non-significant	Up	0.586266
ASV7761	-7.40762	0.987177	MS	Non-significant	Down	0.102997
ASV7801	-4.8441	0	MS	Non-significant	Down	1
ASV7870	-6.05145	0	MS	Non-significant	Down	1
ASV788	-2.32102	0	MS	Non-significant	Down	1
ASV7930	0.955637	0.124486	MC	Non-significant	Up	0.750782
ASV7999	-5.87391	0.947888	MS	Non-significant	Down	0.112749
ASV8095	-4.49238	0	MS	Non-significant	Down	1
ASV8199	-1.42581	0.199039	MS	Non-significant	Down	0.632356
ASV82	-4.10625	0	MS	Non-significant	Down	1
ASV8261	-3.61761	0	MS	Non-significant	Down	1
ASV8333	-4.17141	0	MS	Non-significant	Down	1
ASV8351	-3.64692	0	MS	Non-significant	Down	1
ASV8546	-4.27373	0	MS	Non-significant	Down	1
ASV8550	-2.276	0	MS	Non-significant	Down	1
ASV8553	-5.77714	0	MS	Non-significant	Down	1
ASV8602	-1.43033	0	MS	Non-significant	Down	1
ASV8625	3.5435	0.526515	MC	Non-significant	Up	0.297499
ASV8635	-5.35675	0	MS	Non-significant	Down	1
ASV8713	-1.79563	0	MS	Non-significant	Down	1
ASV8736	21.9243	29.5288	MC	Significant	Up	2.95938e-30
ASV878	-5.7537	0	MS	Non-significant	Down	1
ASV8797	-3.14127	0	MS	Non-significant	Down	1
ASV8958	0.321089	0	MC	Non-significant	Up	1
ASV9103	-1.3719	0	MS	Non-significant	Down	1
ASV9169	-3.86753	0	MS	Non-significant	Down	1
ASV9180	-0.896215	0	MS	Non-significant	Down	1
ASV9207	-3.99662	0	MS	Non-significant	Down	1
ASV9239	6.62392	1.26155	MC	Non-significant	Up	0.0547584
ASV9252	-3.25691	0	MS	Non-significant	Down	1
ASV930	7.67064	2.25769	MC	Significant	Up	0.00552476
ASV9371	-0.583879	0.0743037	MS	Non-significant	Down	0.842745
ASV9433	-2.61508	0	MS	Non-significant	Down	1
ASV9447	-1.69122	0	MS	Non-significant	Down	1
ASV9452	4.51034	1.74327	MC	Significant	Up	0.0180604
ASV947	-6.54018	0.925036	MS	Non-significant	Down	0.11884
ASV9488	-9.09457	1.2838	MS	Non-significant	Down	0.0520232
ASV9565	-4.15226	0	MS	Non-significant	Down	1
ASV9571	-5.8471	0	MS	Non-significant	Down	1
ASV9607	-3.32524	0	MS	Non-significant	Down	1
ASV9638	6.38476	1.31776	MC	Significant	Up	0.0481108
ASV9662	-2.82284	0	MS	Non-significant	Down	1
ASV9669	-2.58877	0	MS	Non-significant	Down	1
ASV9691	-1.01449	0	MS	Non-significant	Down	1
ASV9699	14.8311	31.3432	MC	Significant	Up	4.53733e-32
ASV9714	-7.15037	1.00857	MS	Non-significant	Down	0.0980467
ASV9722	-7.32836	0.969804	MS	Non-significant	Down	0.1072
ASV9773	-2.57328	0	MS	Non-significant	Down	1
ASV9836	-6.45835	0.937393	MS	Non-significant	Down	0.115507
ASV987	2.7731	1.20295	MC	Non-significant	Up	0.0626682
ASV9918	-2.30501	0	MS	Non-significant	Down	1
ASV9931	-2.02494	0	MS	Non-significant	Down	1
ASV9943	-6.76977	1.04575	MS	Non-significant	Down	0.0900009
ASV9986	1.13879	0.0952044	MC	Non-significant	Up	0.803148
ASV9998	-7.3469	1.17135	MS	Non-significant	Down	0.0673983

## Sheet: Table S4
ASV	log2FC	negLog10Padj	Enriched Group	Significance	Regulation	padj
ASV10125	-3.94073	0	BS	Non-significant	Down	1
ASV10202	-5.59038	1.65891	BS	Significant	Down	0.0219326
ASV10236	-6.38212	2.53782	BS	Significant	Down	0.00289853
ASV10251	-3.9296	0	BS	Non-significant	Down	1
ASV10259	-3.00542	0.755963	BS	Non-significant	Down	0.175403
ASV10262	-2.69341	0	BS	Non-significant	Down	1
ASV10278	-8.35892	3.98526	BS	Significant	Down	0.000103453
ASV1035	-3.54997	0	BS	Non-significant	Down	1
ASV10372	-1.88169	0	BS	Non-significant	Down	1
ASV10429	-6.33497	2.13076	BS	Significant	Down	0.00740008
ASV10475	-2.58843	0	BS	Non-significant	Down	1
ASV10476	-8.45188	5.10197	BS	Significant	Down	7.90732e-06
ASV10493	-10.2182	9.06134	BS	Significant	Down	8.68288e-10
ASV10586	-6.44308	2.59624	BS	Significant	Down	0.00253371
ASV10629	-5.56005	0.865265	BS	Non-significant	Down	0.136375
ASV10670	-2.51596	0	BS	Non-significant	Down	1
ASV10702	6.38557	2.25883	BC	Significant	Up	0.00551021
ASV10719	-6.57719	2.41754	BS	Significant	Down	0.00382351
ASV10733	-8.92692	6.31079	BS	Significant	Down	4.88889e-07
ASV10753	-4.52011	0.787471	BS	Non-significant	Down	0.163128
ASV10760	23.8529	23.9908	BC	Significant	Up	1.02138e-24
ASV10800	-8.18056	1.9298	BS	Significant	Down	0.0117544
ASV10806	-5.12169	1.57553	BS	Significant	Down	0.0265745
ASV1082	-2.63541	0.410951	BS	Non-significant	Down	0.388194
ASV10844	-0.462682	0.0344654	BS	Non-significant	Down	0.923708
ASV10935	-7.87282	3.84888	BS	Significant	Down	0.000141617
ASV10940	6.38589	1.77152	BC	Significant	Up	0.016923
ASV10989	-6.70345	2.21977	BS	Significant	Down	0.00602879
ASV11038	-2.28642	0	BS	Non-significant	Down	1
ASV11044	-2.18665	0.222496	BS	Non-significant	Down	0.599106
ASV11083	-3.42034	0.365374	BS	Non-significant	Down	0.431148
ASV1122	-0.413357	0	BS	Non-significant	Down	1
ASV11259	7.0801	4.87935	BC	Significant	Up	1.32022e-05
ASV11266	-1.35677	0	BS	Non-significant	Down	1
ASV11298	-1.70599	0	BS	Non-significant	Down	1
ASV11308	5.69314	1.76956	BC	Significant	Up	0.0169998
ASV11324	-6.15278	1.71282	BS	Significant	Down	0.0193723
ASV11345	-5.01152	0.963551	BS	Non-significant	Down	0.108755
ASV11350	-1.96932	0	BS	Non-significant	Down	1
ASV11400	-1.15118	0	BS	Non-significant	Down	1
ASV11402	-5.30038	0.780638	BS	Non-significant	Down	0.165715
ASV11445	0	0	BS	Non-significant	Down	1
ASV1145	-7.39647	2.64189	BS	Significant	Down	0.00228091
ASV11476	8.27126	4.42549	BC	Significant	Up	3.75413e-05
ASV11537	-2.73967	0	BS	Non-significant	Down	1
ASV11539	5.5482	1.98654	BC	Significant	Up	0.0103148
ASV11551	21.4575	8.6006	BC	Significant	Up	2.5084e-09
ASV11613	-3.39571	0.725004	BS	Non-significant	Down	0.188363
ASV11631	-7.49905	3.4783	BS	Significant	Down	0.000332433
ASV11638	-3.14637	0	BS	Non-significant	Down	1
ASV11736	-4.88919	1.02699	BS	Non-significant	Down	0.0939749
ASV11761	-4.36934	0.588854	BS	Non-significant	Down	0.257719
ASV11819	-6.20553	1.56047	BS	Significant	Down	0.0275122
ASV11836	-1.83561	0	BS	Non-significant	Down	1
ASV11865	-4.64377	7.99371	BS	Significant	Down	1.0146e-08
ASV11871	6.23111	1.80504	BC	Significant	Up	0.0156659
ASV11880	-2.5655	0	BS	Non-significant	Down	1
ASV11919	1.61641	0.598323	BC	Non-significant	Up	0.252161
ASV11947	-3.76995	0	BS	Non-significant	Down	1
ASV11994	-1.48405	0.365374	BS	Non-significant	Down	0.431148
ASV12028	-9.2292	5.67867	BS	Significant	Down	2.09569e-06
ASV12100	-5.96229	1.36666	BS	Significant	Down	0.0429876
ASV12153	-8.99035	6.54229	BS	Significant	Down	2.86884e-07
ASV12154	-1.25503	0	BS	Non-significant	Down	1
ASV12167	-3.23782	0	BS	Non-significant	Down	1
ASV12237	-2.38065	0	BS	Non-significant	Down	1
ASV1225	0.161071	0.0332782	BC	Non-significant	Up	0.926236
ASV12263	-7.72861	5.39147	BS	Significant	Down	4.06001e-06
ASV1230	-2.69065	0	BS	Non-significant	Down	1
ASV12308	-9.26423	4.70282	BS	Significant	Down	1.98235e-05
ASV12356	-6.70043	2.21172	BS	Significant	Down	0.00614163
ASV12358	1.1708	0.237407	BC	Non-significant	Up	0.578886
ASV12359	-1.11271	0	BS	Non-significant	Down	1
ASV12367	-1.10255	0	BS	Non-significant	Down	1
ASV1243	21.6306	24.033	BC	Significant	Up	9.26744e-25
ASV12430	2.89057	0.837133	BC	Non-significant	Up	0.145501
ASV1246	-5.27788	0.965162	BS	Non-significant	Down	0.108352
ASV12460	-4.84451	0.74035	BS	Non-significant	Down	0.181824
ASV12483	-7.09348	3.59886	BS	Significant	Down	0.000251848
ASV12496	0.914486	0.109738	BC	Non-significant	Up	0.776716
ASV12527	-10.4523	6.88405	BS	Significant	Down	1.30602e-07
ASV12530	-2.11675	0	BS	Non-significant	Down	1
ASV12567	-3.1925	0	BS	Non-significant	Down	1
ASV12625	-2.03351	0	BS	Non-significant	Down	1
ASV12632	-3.56041	0	BS	Non-significant	Down	1
ASV12641	-1.0892	0	BS	Non-significant	Down	1
ASV12647	-4.30084	0.571879	BS	Non-significant	Down	0.267991
ASV12651	4.13817	1.10295	BC	Non-significant	Up	0.0788952
ASV12660	-1.34369	0	BS	Non-significant	Down	1
ASV12671	-1.82336	0	BS	Non-significant	Down	1
ASV12687	-4.33126	0.517835	BS	Non-significant	Down	0.303505
ASV12692	-1.61111	0	BS	Non-significant	Down	1
ASV12703	-2.41244	0	BS	Non-significant	Down	1
ASV12744	5.88242	1.58116	BC	Significant	Up	0.0262326
ASV12779	-2.7459	0	BS	Non-significant	Down	1
ASV12885	20.3276	16.4268	BC	Significant	Up	3.74254e-17
ASV12897	-6.35181	2.4866	BS	Significant	Down	0.00326139
ASV12922	7.00788	3.26958	BC	Significant	Up	0.000537547
ASV12932	-2.44859	0	BS	Non-significant	Down	1
ASV13030	7.18162	2.77674	BC	Significant	Up	0.0016721
ASV13065	-1.54848	0.173752	BS	Non-significant	Down	0.670268
ASV13084	-0.912409	0.182858	BS	Non-significant	Down	0.65636
ASV13094	-2.86741	0	BS	Non-significant	Down	1
ASV13126	-5.67795	1.99717	BS	Significant	Down	0.0100653
ASV13170	-4.97146	0.609741	BS	Non-significant	Down	0.245617
ASV13195	-2.44227	0	BS	Non-significant	Down	1
ASV13205	-3.4522	0	BS	Non-significant	Down	1
ASV13238	0.053915	0.00455755	BC	Non-significant	Up	0.989561
ASV13239	0.197681	0.0279592	BC	Non-significant	Up	0.93765
ASV13322	-4.17967	0.605972	BS	Non-significant	Down	0.247758
ASV13347	-2.67825	0	BS	Non-significant	Down	1
ASV13439	-2.70682	0	BS	Non-significant	Down	1
ASV13463	-0.628611	0.126065	BS	Non-significant	Down	0.748057
ASV13505	-3.98989	0	BS	Non-significant	Down	1
ASV13589	8.31119	5.91689	BC	Significant	Up	1.2109e-06
ASV1359	-1.21472	0	BS	Non-significant	Down	1
ASV13592	-7.5054	2.95729	BS	Significant	Down	0.00110333
ASV13698	-3.30594	0	BS	Non-significant	Down	1
ASV13715	-6.50851	3.21651	BS	Significant	Down	0.000607422
ASV13719	-9.40341	7.24856	BS	Significant	Down	5.64205e-08
ASV13721	-8.55276	6.09828	BS	Significant	Down	7.97483e-07
ASV13730	5.57877	0.814431	BC	Non-significant	Up	0.153309
ASV13735	-8.21548	6.18294	BS	Significant	Down	6.56242e-07
ASV13750	22.4697	6.45757	BC	Significant	Up	3.48684e-07
ASV1378	-7.07276	4.24182	BS	Significant	Down	5.73034e-05
ASV13781	-1.57727	0	BS	Non-significant	Down	1
ASV13811	-8.45334	6.0704	BS	Significant	Down	8.50355e-07
ASV13841	-6.82483	2.72775	BS	Significant	Down	0.00187178
ASV13857	-2.80691	0	BS	Non-significant	Down	1
ASV13880	3.80918	0.698135	BC	Non-significant	Up	0.200385
ASV13918	-6.10413	0.815331	BS	Non-significant	Down	0.152992
ASV13931	-1.94644	0	BS	Non-significant	Down	1
ASV13937	-1.7861	0	BS	Non-significant	Down	1
ASV13956	6.00126	1.57629	BC	Significant	Up	0.0265281
ASV13990	6.6888	2.54125	BC	Significant	Up	0.00287571
ASV13998	-5.68098	1.73847	BS	Significant	Down	0.0182613
ASV14057	5.65807	2.3982	BC	Significant	Up	0.00399762
ASV1407	-4.60825	0.981935	BS	Non-significant	Down	0.104247
ASV1410	-5.99713	1.59074	BS	Significant	Down	0.0256601
ASV14245	-3.03615	0	BS	Non-significant	Down	1
ASV14250	29.514	68.0758	BC	Significant	Up	8.39783e-69
ASV14272	-5.66777	1.72524	BS	Significant	Down	0.0188261
ASV14285	22.3049	21.0135	BC	Significant	Up	9.69309e-22
ASV14295	-3.36371	0	BS	Non-significant	Down	1
ASV14323	5.10047	1.37506	BC	Significant	Up	0.0421638
ASV14382	-2.37166	0	BS	Non-significant	Down	1
ASV14393	0	0	BS	Non-significant	Down	1
ASV1445	-8.00048	5.70448	BS	Significant	Down	1.97477e-06
ASV14451	-6.19835	2.85173	BS	Significant	Down	0.00140692
ASV14460	-4.66051	0.542394	BS	Non-significant	Down	0.286818
ASV14463	-1.57213	0	BS	Non-significant	Down	1
ASV14466	4.07571	0.828478	BC	Non-significant	Up	0.14843
ASV14478	-7.18463	3.09936	BS	Significant	Down	0.000795499
ASV1455	-6.21716	1.8225	BS	Significant	Down	0.0150488
ASV14576	-2.49995	0	BS	Non-significant	Down	1
ASV14577	7.08213	3.17181	BC	Significant	Up	0.000673266
ASV14601	5.34465	1.40867	BC	Significant	Up	0.0390235
ASV14615	-3.61433	0.799192	BS	Non-significant	Down	0.158784
ASV14679	2.10801	0.529458	BC	Non-significant	Up	0.29549
ASV14683	-8.37886	5.60512	BS	Significant	Down	2.48243e-06
ASV14723	-5.55432	1.41118	BS	Significant	Down	0.0387987
ASV1475	-7.30096	4.70282	BS	Significant	Down	1.98235e-05
ASV148	-2.62891	0	BS	Non-significant	Down	1
ASV14853	1.9877	0.277167	BC	Non-significant	Up	0.528242
ASV14854	-2.93057	0	BS	Non-significant	Down	1
ASV14869	-5.20772	1.14611	BS	Non-significant	Down	0.0714308
ASV1489	5.75559	1.60889	BC	Significant	Up	0.0246098
ASV14979	7.11127	2.3138	BC	Significant	Up	0.00485515
ASV14997	-1.76813	0	BS	Non-significant	Down	1
ASV15091	6.84086	4.38619	BC	Significant	Up	4.10966e-05
ASV15093	-6.35288	2.929	BS	Significant	Down	0.00117761
ASV15144	8.44552	5.37061	BC	Significant	Up	4.25983e-06
ASV15159	-7.25299	1.20503	BS	Non-significant	Down	0.0623693
ASV15165	-2.24232	0	BS	Non-significant	Down	1
ASV15235	-0.413357	0	BS	Non-significant	Down	1
ASV15290	-1.53344	0	BS	Non-significant	Down	1
ASV15383	7.50255	1.01576	BC	Non-significant	Up	0.0964354
ASV15407	-3.7485	0	BS	Non-significant	Down	1
ASV15493	5.80066	1.86019	BC	Significant	Up	0.0137978
ASV15524	2.63558	0.535342	BC	Non-significant	Up	0.291513
ASV15596	-7.31233	4.70282	BS	Significant	Down	1.98235e-05
ASV15628	-7.58032	3.07574	BS	Significant	Down	0.000839962
ASV15664	-7.39355	4.81635	BS	Significant	Down	1.52635e-05
ASV15673	-3.34642	0	BS	Non-significant	Down	1
ASV15850	-2.19218	0	BS	Non-significant	Down	1
ASV1586	-3.93699	0	BS	Non-significant	Down	1
ASV15860	-1.11977	0.111808	BS	Non-significant	Down	0.773022
ASV15909	-2.63886	0	BS	Non-significant	Down	1
ASV15975	-1.83969	0	BS	Non-significant	Down	1
ASV1599	-6.22152	1.76263	BS	Significant	Down	0.0172731
ASV16019	-5.7613	1.08534	BS	Non-significant	Down	0.0821596
ASV16025	-4.04597	0	BS	Non-significant	Down	1
ASV16067	-5.9603	2.8534	BS	Significant	Down	0.00140153
ASV16088	-6.09253	2.54125	BS	Significant	Down	0.00287571
ASV161	-2.00621	0.622814	BS	Non-significant	Down	0.238334
ASV16146	-5.67993	1.16734	BS	Non-significant	Down	0.0680229
ASV16159	-3.60563	0	BS	Non-significant	Down	1
ASV16225	-0.896574	0	BS	Non-significant	Down	1
ASV16234	-2.46714	0	BS	Non-significant	Down	1
ASV16250	-5.8825	1.69692	BS	Significant	Down	0.0200946
ASV16291	-6.84114	0.899908	BS	Non-significant	Down	0.125919
ASV16299	6.57121	1.83752	BC	Significant	Up	0.0145372
ASV16301	-3.74381	0	BS	Non-significant	Down	1
ASV16327	-3.51854	0	BS	Non-significant	Down	1
ASV16401	-3.17085	0	BS	Non-significant	Down	1
ASV16402	-1.23621	0	BS	Non-significant	Down	1
ASV16420	6.85399	2.70162	BC	Significant	Up	0.00198783
ASV16443	-3.47828	0	BS	Non-significant	Down	1
ASV16516	-5.6969	1.95926	BS	Significant	Down	0.0109836
ASV16580	-3.43056	0	BS	Non-significant	Down	1
ASV16582	-5.09758	0.887719	BS	Non-significant	Down	0.129503
ASV16608	-7.78087	4.9604	BS	Significant	Down	1.09546e-05
ASV16663	-3.51296	0	BS	Non-significant	Down	1
ASV16710	-2.62821	0.341506	BS	Non-significant	Down	0.455506
ASV16712	-1.11322	0	BS	Non-significant	Down	1
ASV16898	-3.17038	0.899869	BS	Non-significant	Down	0.12593
ASV17059	5.63712	1.49312	BC	Significant	Up	0.0321278
ASV17144	-0.998513	0.154571	BS	Non-significant	Down	0.700534
ASV17207	-4.78831	0.983672	BS	Non-significant	Down	0.103831
ASV17208	-0.339407	0.0672985	BS	Non-significant	Down	0.856449
ASV17217	-4.06101	0	BS	Non-significant	Down	1
ASV17228	-3.16814	0	BS	Non-significant	Down	1
ASV17307	5.03882	1.61701	BC	Significant	Up	0.0241542
ASV17320	-1.66737	0	BS	Non-significant	Down	1
ASV17340	-6.47988	2.40508	BS	Significant	Down	0.00393477
ASV17342	-4.19655	0.576325	BS	Non-significant	Down	0.265262
ASV1738	-6.46552	1.98062	BS	Significant	Down	0.0104563
ASV17430	6.54418	3.56649	BC	Significant	Up	0.000271336
ASV17434	-4.81215	0.63179	BS	Non-significant	Down	0.233459
ASV17442	-3.15555	0	BS	Non-significant	Down	1
ASV17496	-8.32708	5.80032	BS	Significant	Down	1.58374e-06
ASV17497	-5.13979	1.02685	BS	Non-significant	Down	0.094004
ASV17517	-7.29677	4.79917	BS	Significant	Down	1.58792e-05
ASV17527	-1.97176	0	BS	Non-significant	Down	1
ASV17529	3.83398	1.01576	BC	Non-significant	Up	0.0964354
ASV17563	-1.84781	0	BS	Non-significant	Down	1
ASV17586	7.77701	5.17236	BC	Significant	Up	6.72425e-06
ASV17641	-6.62466	2.86296	BS	Significant	Down	0.00137102
ASV17786	8.72528	5.81722	BC	Significant	Up	1.52329e-06
ASV17793	-3.02687	0	BS	Non-significant	Down	1
ASV179	-3.24023	0.422864	BS	Non-significant	Down	0.377691
ASV18001	-7.54202	4.98758	BS	Significant	Down	1.02902e-05
ASV18076	-2.45948	0	BS	Non-significant	Down	1
ASV18093	-7.50307	4.71296	BS	Significant	Down	1.93661e-05
ASV1812	-4.99104	0.769067	BS	Non-significant	Down	0.17019
ASV18120	3.30549	0.516194	BC	Non-significant	Up	0.304653
ASV18125	2.00641	0.492467	BC	Non-significant	Up	0.321761
ASV18167	-1.48838	0	BS	Non-significant	Down	1
ASV18187	-4.63694	0.588854	BS	Non-significant	Down	0.257719
ASV183	-0.797553	0.154254	BS	Non-significant	Down	0.701045
ASV18317	-1.97634	0	BS	Non-significant	Down	1
ASV18350	-5.31537	1.53463	BS	Significant	Down	0.029199
ASV18352	2.01054	0.716643	BC	Non-significant	Up	0.192025
ASV18367	4.94889	1.21851	BC	Non-significant	Up	0.0604626
ASV18374	7.89944	3.50643	BC	Significant	Up	0.000311581
ASV18424	-4.59726	0.795069	BS	Non-significant	Down	0.160299
ASV18427	-2.91554	0	BS	Non-significant	Down	1
ASV1843	0.697939	0.0642857	BC	Non-significant	Up	0.862411
ASV18444	-3.63435	0	BS	Non-significant	Down	1
ASV18474	4.4898	1.1572	BC	Non-significant	Up	0.0696303
ASV18477	3.78919	1.77651	BC	Significant	Up	0.0167298
ASV18502	5.34864	1.49339	BC	Significant	Up	0.0321075
ASV18554	-6.03756	1.62018	BS	Significant	Down	0.0239782
ASV18566	-5.29055	1.10295	BS	Non-significant	Down	0.0788952
ASV18599	5.76166	1.92626	BC	Significant	Up	0.0118506
ASV18634	-6.05582	1.63513	BS	Significant	Down	0.0231669
ASV18717	-0.00739116	0.00117589	BS	Non-significant	Down	0.997296
ASV18730	22.6348	23.9026	BC	Significant	Up	1.25134e-24
ASV18736	-3.72887	0	BS	Non-significant	Down	1
ASV18802	-2.13343	0	BS	Non-significant	Down	1
ASV18831	-5.53813	1.617	BS	Significant	Down	0.0241548
ASV18840	23.5903	24.49	BC	Significant	Up	3.23571e-25
ASV18860	-1.44913	0.192259	BS	Non-significant	Down	0.642305
ASV18879	-5.92448	1.97503	BS	Significant	Down	0.0105919
ASV18906	-4.01163	0	BS	Non-significant	Down	1
ASV18973	6.70203	2.28573	BC	Significant	Up	0.00517926
ASV19053	-4.61581	0.814431	BS	Non-significant	Down	0.153309
ASV19056	-1.80712	0	BS	Non-significant	Down	1
ASV19082	2.04584	0.467086	BC	Non-significant	Up	0.341125
ASV1910	-3.58265	0	BS	Non-significant	Down	1
ASV19114	4.14502	0.847436	BC	Non-significant	Up	0.14209
ASV19142	-1.6764	0	BS	Non-significant	Down	1
ASV1915	-3.85778	0	BS	Non-significant	Down	1
ASV19165	-6.3519	2.88578	BS	Significant	Down	0.00130082
ASV19166	22.0696	19.627	BC	Significant	Up	2.3604e-20
ASV19244	20.5776	16.465	BC	Significant	Up	3.42778e-17
ASV19261	-8.17543	5.80032	BS	Significant	Down	1.58374e-06
ASV19316	6.3631	2.04794	BC	Significant	Up	0.00895483
ASV1932	-6.54403	1.22139	BS	Non-significant	Down	0.0600631
ASV19334	4.96508	1.43305	BC	Significant	Up	0.0368936
ASV19352	-1.37236	0.128475	BS	Non-significant	Down	0.743917
ASV19354	0.526414	0.195406	BC	Non-significant	Up	0.637666
ASV19371	-4.06154	0.899908	BS	Non-significant	Down	0.125919
ASV19384	-2.79999	0.365374	BS	Non-significant	Down	0.431148
ASV19444	-7.40559	3.83579	BS	Significant	Down	0.000145951
ASV19466	-1.1277	0	BS	Non-significant	Down	1
ASV195	-4.5656	0.7515	BS	Non-significant	Down	0.177215
ASV19551	-7.70973	1.66334	BS	Significant	Down	0.0217102
ASV19563	-3.80744	0	BS	Non-significant	Down	1
ASV1957	-6.99188	4.00066	BS	Significant	Down	9.9848e-05
ASV19655	-3.04687	0	BS	Non-significant	Down	1
ASV19688	-3.61359	0	BS	Non-significant	Down	1
ASV19690	-4.75555	1.72848	BS	Significant	Down	0.0186861
ASV1972	-2.30853	0	BS	Non-significant	Down	1
ASV19779	-3.94862	0	BS	Non-significant	Down	1
ASV19780	-4.41086	0.847235	BS	Non-significant	Down	0.142156
ASV19855	1.5083	0.735994	BC	Non-significant	Up	0.183656
ASV19884	-5.17888	0.921012	BS	Non-significant	Down	0.119947
ASV19894	-2.83086	0	BS	Non-significant	Down	1
ASV19916	-2.91855	0	BS	Non-significant	Down	1
ASV19942	-7.41913	4.78154	BS	Significant	Down	1.6537e-05
ASV19954	-5.3907	1.15654	BS	Non-significant	Down	0.0697367
ASV19955	-8.19999	5.81722	BS	Significant	Down	1.52329e-06
ASV1998	-3.75726	0	BS	Non-significant	Down	1
ASV200	5.01166	1.24587	BC	Non-significant	Up	0.0567711
ASV20118	-1.56205	0.176893	BS	Non-significant	Down	0.665438
ASV20180	-2.47004	0	BS	Non-significant	Down	1
ASV20195	-3.34194	0	BS	Non-significant	Down	1
ASV20201	22.6692	23.4644	BC	Significant	Up	3.43264e-24
ASV20215	-5.06175	0.789296	BS	Non-significant	Down	0.162444
ASV20232	-5.86454	1.68634	BS	Significant	Down	0.0205903
ASV20271	-3.70757	0	BS	Non-significant	Down	1
ASV20283	-5.96596	1.56802	BS	Significant	Down	0.0270386
ASV20320	-5.96918	1.57531	BS	Significant	Down	0.0265884
ASV20364	22.8572	48.494	BC	Significant	Up	3.20646e-49
ASV20372	-4.7198	0.768351	BS	Non-significant	Down	0.17047
ASV20386	-2.27444	0	BS	Non-significant	Down	1
ASV20490	8.4673	6.56266	BC	Significant	Up	2.73742e-07
ASV20495	-2.35177	0.768351	BS	Non-significant	Down	0.17047
ASV20560	-5.46217	1.35868	BS	Significant	Down	0.0437844
ASV2072	-3.39704	0	BS	Non-significant	Down	1
ASV20735	-6.77472	3.08411	BS	Significant	Down	0.000823922
ASV20764	-3.84178	0	BS	Non-significant	Down	1
ASV20807	-2.83849	0	BS	Non-significant	Down	1
ASV20823	-3.5617	0	BS	Non-significant	Down	1
ASV2085	5.42311	1.69855	BC	Significant	Up	0.0200193
ASV20939	-3.59215	0	BS	Non-significant	Down	1
ASV20962	-4.07322	0	BS	Non-significant	Down	1
ASV20985	-4.04897	0	BS	Non-significant	Down	1
ASV21029	-1.40993	0	BS	Non-significant	Down	1
ASV21070	-1.85304	0	BS	Non-significant	Down	1
ASV21104	-2.95212	0	BS	Non-significant	Down	1
ASV21129	5.29868	1.35063	BC	Significant	Up	0.0446041
ASV21249	0	0	BS	Non-significant	Down	1
ASV21261	22.5792	22.6488	BC	Significant	Up	2.24498e-23
ASV21289	-8.613	6.19967	BS	Significant	Down	6.31437e-07
ASV21314	-1.10299	0	BS	Non-significant	Down	1
ASV21344	-8.67487	5.70448	BS	Significant	Down	1.97477e-06
ASV21355	21.7992	23.0112	BC	Significant	Up	9.74595e-24
ASV21393	-3.76929	0	BS	Non-significant	Down	1
ASV21419	-7.64424	3.6423	BS	Significant	Down	0.000227874
ASV21470	6.30631	2.52525	BC	Significant	Up	0.00298368
ASV21559	-4.45215	0.513433	BS	Non-significant	Down	0.306596
ASV21658	-3.4992	0	BS	Non-significant	Down	1
ASV21662	-6.43855	2.61071	BS	Significant	Down	0.0024507
ASV21682	-1.61496	0	BS	Non-significant	Down	1
ASV21689	-5.23098	1.07393	BS	Non-significant	Down	0.0843463
ASV21702	-6.28125	2.40871	BS	Significant	Down	0.00390207
ASV21714	-3.45543	0	BS	Non-significant	Down	1
ASV21726	-1.44793	0.346112	BS	Non-significant	Down	0.4507
ASV21782	-8.09291	1.53355	BS	Significant	Down	0.029272
ASV21813	-7.50988	5.08032	BS	Significant	Down	8.3115e-06
ASV21820	5.88661	2.15898	BC	Significant	Up	0.00693461
ASV21868	-6.23325	2.0092	BS	Significant	Down	0.00979042
ASV21923	-2.12511	0	BS	Non-significant	Down	1
ASV2196	-5.36794	1.13728	BS	Non-significant	Down	0.0728993
ASV21966	-7.61494	3.59886	BS	Significant	Down	0.000251848
ASV22010	-7.92465	3.81926	BS	Significant	Down	0.000151614
ASV22253	-5.68518	2.00553	BS	Significant	Down	0.00987348
ASV22254	-2.71039	0	BS	Non-significant	Down	1
ASV22259	5.73691	1.60142	BC	Significant	Up	0.0250368
ASV22304	6.69186	1.74728	BC	Significant	Up	0.0178946
ASV22323	-3.27207	0.492525	BS	Non-significant	Down	0.321718
ASV22404	-2.05206	0	BS	Non-significant	Down	1
ASV22507	7.14423	2.38319	BC	Significant	Up	0.00413822
ASV22560	-4.65625	0.542394	BS	Non-significant	Down	0.286818
ASV22585	-1.79901	0	BS	Non-significant	Down	1
ASV22633	-4.29044	0.492467	BS	Non-significant	Down	0.321761
ASV22647	-6.86858	3.77288	BS	Significant	Down	0.000168703
ASV22712	22.649	19.857	BC	Significant	Up	1.39011e-20
ASV22755	-4.4641	0.610269	BS	Non-significant	Down	0.245319
ASV22815	-1.92033	0	BS	Non-significant	Down	1
ASV2283	-5.51924	1.08557	BS	Non-significant	Down	0.0821156
ASV22886	-5.94341	1.73847	BS	Significant	Down	0.0182613
ASV22893	-5.86308	2.15933	BS	Significant	Down	0.00692906
ASV22977	-8.23187	1.73847	BS	Significant	Down	0.0182613
ASV22994	-1.68409	0	BS	Non-significant	Down	1
ASV2303	-3.41154	0	BS	Non-significant	Down	1
ASV23104	-2.50211	0	BS	Non-significant	Down	1
ASV23125	-6.91277	3.97965	BS	Significant	Down	0.000104798
ASV23143	-6.25464	3.09936	BS	Significant	Down	0.000795499
ASV23351	-1.65343	0.427476	BS	Non-significant	Down	0.3737
ASV23373	-7.28351	2.81665	BS	Significant	Down	0.00152528
ASV23445	-4.79941	0.790994	BS	Non-significant	Down	0.16181
ASV23453	-5.71561	0.718654	BS	Non-significant	Down	0.191137
ASV23456	4.50345	1.43076	BC	Significant	Up	0.0370885
ASV2361	-5.24736	1.08339	BS	Non-significant	Down	0.082529
ASV23688	6.0279	1.13195	BC	Non-significant	Up	0.0737996
ASV237	5.35355	1.58116	BC	Significant	Up	0.0262326
ASV23732	24.9944	10.6687	BC	Significant	Up	2.14462e-11
ASV23785	-3.1395	0	BS	Non-significant	Down	1
ASV23850	-3.72712	0	BS	Non-significant	Down	1
ASV23904	-4.47585	0.549665	BS	Non-significant	Down	0.282055
ASV2393	-5.96171	1.36398	BS	Significant	Down	0.043253
ASV23947	-6.6114	2.5407	BS	Significant	Down	0.00287939
ASV24056	-6.19882	2.15006	BS	Significant	Down	0.0070784
ASV24083	-5.2488	0.948611	BS	Non-significant	Down	0.112561
ASV24133	25.192	41.3017	BC	Significant	Up	4.99172e-42
ASV24156	5.26164	0.866996	BC	Non-significant	Up	0.135833
ASV2416	26.0165	10.4958	BC	Significant	Up	3.19315e-11
ASV24171	-2.01758	0	BS	Non-significant	Down	1
ASV24181	-5.51213	1.21947	BS	Non-significant	Down	0.0603296
ASV24247	6.94103	1.90167	BC	Significant	Up	0.0125409
ASV2456	-3.02263	0	BS	Non-significant	Down	1
ASV2476	-6.70714	2.58514	BS	Significant	Down	0.00259933
ASV2506	-3.08825	0	BS	Non-significant	Down	1
ASV2563	-7.87723	4.27659	BS	Significant	Down	5.28945e-05
ASV259	-7.4476	3.78065	BS	Significant	Down	0.000165712
ASV2695	-5.19714	1.92223	BS	Significant	Down	0.0119611
ASV2725	6.38039	1.85602	BC	Significant	Up	0.013931
ASV2823	-7.46303	4.87935	BS	Significant	Down	1.32022e-05
ASV2837	-5.14831	1.32383	BS	Significant	Down	0.0474424
ASV2845	-2.25799	0	BS	Non-significant	Down	1
ASV2857	-6.96909	2.90663	BS	Significant	Down	0.00123984
ASV2906	-5.9213	1.34372	BS	Significant	Down	0.0453189
ASV2946	-4.71871	0.847235	BS	Non-significant	Down	0.142156
ASV2984	-4.17102	0.759498	BS	Non-significant	Down	0.173981
ASV3080	-7.39954	4.04042	BS	Significant	Down	9.11119e-05
ASV3124	7.10611	2.64594	BC	Significant	Up	0.00225976
ASV3142	22.3363	16.0486	BC	Significant	Up	8.94159e-17
ASV3196	-3.84641	0	BS	Non-significant	Down	1
ASV320	-1.75087	0	BS	Non-significant	Down	1
ASV3212	-1.0379	0	BS	Non-significant	Down	1
ASV3235	-4.84987	0.571879	BS	Non-significant	Down	0.267991
ASV327	5.19296	1.30972	BC	Significant	Up	0.049009
ASV3280	-6.8128	3.31698	BS	Significant	Down	0.000481974
ASV3289	-3.71525	0	BS	Non-significant	Down	1
ASV333	1.85692	0.492525	BC	Non-significant	Up	0.321718
ASV3337	-3.15642	0	BS	Non-significant	Down	1
ASV3376	21.5954	11.4775	BC	Significant	Up	3.3303e-12
ASV3381	-1.49523	0	BS	Non-significant	Down	1
ASV3421	-3.13777	0	BS	Non-significant	Down	1
ASV3427	-6.55099	3.21651	BS	Significant	Down	0.000607422
ASV3429	-4.28128	0.899908	BS	Non-significant	Down	0.125919
ASV3458	22.4502	18.0253	BC	Significant	Up	9.43399e-19
ASV346	-7.04224	3.52974	BS	Significant	Down	0.000295295
ASV3481	-5.23055	3.20947	BS	Significant	Down	0.000617354
ASV3493	2.07833	0.716643	BC	Non-significant	Up	0.192025
ASV3588	0.0578518	0.00823334	BC	Non-significant	Up	0.981221
ASV3638	1.13359	0	BC	Non-significant	Up	1
ASV3640	-4.98002	0.767642	BS	Non-significant	Down	0.170749
ASV3668	-4.11958	0.530324	BS	Non-significant	Down	0.294901
ASV3675	-1.76937	0	BS	Non-significant	Down	1
ASV3701	-5.91469	2.24024	BS	Significant	Down	0.0057512
ASV3702	-7.22735	3.21651	BS	Significant	Down	0.000607422
ASV3723	-3.24517	0.829721	BS	Non-significant	Down	0.148006
ASV3813	-2.53179	0.303797	BS	Non-significant	Down	0.496825
ASV3917	22.1422	19.0094	BC	Significant	Up	9.78476e-20
ASV3964	-6.06043	2.12569	BS	Significant	Down	0.00748697
ASV3975	-5.06938	1.81072	BS	Significant	Down	0.0154625
ASV4024	-7.20912	4.23384	BS	Significant	Down	5.83655e-05
ASV4042	-3.90162	0	BS	Non-significant	Down	1
ASV4044	-6.25078	2.3416	BS	Significant	Down	0.00455407
ASV4063	-1.80364	0	BS	Non-significant	Down	1
ASV4094	0.991317	0.23517	BC	Non-significant	Up	0.581876
ASV4142	1.22279	0.237246	BC	Non-significant	Up	0.579101
ASV4204	-3.47861	0	BS	Non-significant	Down	1
ASV4215	-2.36789	0	BS	Non-significant	Down	1
ASV4218	-7.30134	2.76594	BS	Significant	Down	0.00171421
ASV4229	-4.7293	0.847436	BS	Non-significant	Down	0.14209
ASV4235	-0.0927673	0	BS	Non-significant	Down	1
ASV4258	-4.83951	1.69368	BS	Significant	Down	0.020245
ASV4270	6.18551	1.88012	BC	Significant	Up	0.0131789
ASV4332	4.64985	1.39081	BC	Significant	Up	0.0406621
ASV437	-5.16691	1.82494	BS	Significant	Down	0.0149646
ASV4383	0	0	BS	Non-significant	Down	1
ASV4456	-4.11344	0	BS	Non-significant	Down	1
ASV4475	-6.77878	2.7436	BS	Significant	Down	0.00180467
ASV448	22.8382	36.0556	BC	Significant	Up	8.79885e-37
ASV4541	-3.71042	0	BS	Non-significant	Down	1
ASV4631	1.18187	0.501284	BC	Non-significant	Up	0.315294
ASV4641	-1.82018	0.588854	BS	Non-significant	Down	0.257719
ASV4720	-7.53703	1.70452	BS	Significant	Down	0.0197461
ASV473	-6.39538	2.20683	BS	Significant	Down	0.00621116
ASV4769	-6.19193	2.25169	BS	Significant	Down	0.00560153
ASV4786	-5.84341	1.28198	BS	Non-significant	Down	0.0522421
ASV4812	-7.70159	4.44849	BS	Significant	Down	3.56051e-05
ASV4823	-4.61523	1.1149	BS	Non-significant	Down	0.0767539
ASV4845	-6.32449	2.13076	BS	Significant	Down	0.00740008
ASV4935	-5.64947	1.16061	BS	Non-significant	Down	0.0690862
ASV4961	-3.76968	0	BS	Non-significant	Down	1
ASV5019	6.14557	1.74436	BC	Significant	Up	0.0180153
ASV5020	-2.40893	0	BS	Non-significant	Down	1
ASV5123	-3.93736	0	BS	Non-significant	Down	1
ASV5285	-4.49969	0.554635	BS	Non-significant	Down	0.278847
ASV5298	-3.7056	0	BS	Non-significant	Down	1
ASV5315	-3.62758	0	BS	Non-significant	Down	1
ASV5388	-5.51953	1.69692	BS	Significant	Down	0.0200946
ASV5392	-5.05834	1.22229	BS	Non-significant	Down	0.0599395
ASV5485	-1.68947	0.187287	BS	Non-significant	Down	0.6497
ASV550	-2.5155	0	BS	Non-significant	Down	1
ASV5507	-4.78246	1.01651	BS	Non-significant	Down	0.0962704
ASV5569	5.11374	1.54277	BC	Significant	Up	0.0286571
ASV5573	-4.46583	0.610269	BS	Non-significant	Down	0.245319
ASV5660	-5.03575	1.05664	BS	Non-significant	Down	0.0877719
ASV5725	-8.12961	5.79607	BS	Significant	Down	1.59931e-06
ASV5736	-3.67405	0	BS	Non-significant	Down	1
ASV577	-5.86948	1.29991	BS	Non-significant	Down	0.0501289
ASV5811	-1.92342	0	BS	Non-significant	Down	1
ASV5835	-5.24899	1.97503	BS	Significant	Down	0.0105919
ASV5989	-4.76416	0.778825	BS	Non-significant	Down	0.166408
ASV6028	-7.13063	3.65032	BS	Significant	Down	0.00022371
ASV6048	-4.82657	0.71964	BS	Non-significant	Down	0.190704
ASV6053	8.51981	7.56486	BC	Significant	Up	2.72361e-08
ASV6100	-1.76051	0.242722	BS	Non-significant	Down	0.571845
ASV6107	-5.98803	1.58116	BS	Significant	Down	0.0262326
ASV6136	-2.01343	0	BS	Non-significant	Down	1
ASV6140	-3.10147	0	BS	Non-significant	Down	1
ASV6158	-6.68692	3.17214	BS	Significant	Down	0.000672762
ASV6176	-6.73564	0.921012	BS	Non-significant	Down	0.119947
ASV6189	28.2234	37.8444	BC	Significant	Up	1.43088e-38
ASV619	0	0	BS	Non-significant	Down	1
ASV621	1.27124	0.117461	BC	Non-significant	Up	0.763025
ASV6233	-4.76098	0.78012	BS	Non-significant	Down	0.165913
ASV6266	-7.12266	3.08411	BS	Significant	Down	0.000823922
ASV627	-0.75001	0	BS	Non-significant	Down	1
ASV6283	-6.40298	1.92573	BS	Significant	Down	0.011865
ASV6322	0.142388	0.0170415	BC	Non-significant	Up	0.96152
ASV6342	-1.59161	0.690326	BS	Non-significant	Down	0.204021
ASV6425	-9.07116	5.72173	BS	Significant	Down	1.89789e-06
ASV6436	-1.98049	0.200088	BS	Non-significant	Down	0.630829
ASV644	-2.7527	0	BS	Non-significant	Down	1
ASV6446	21.4234	20.2344	BC	Significant	Up	5.82877e-21
ASV6459	-1.77908	0	BS	Non-significant	Down	1
ASV6495	-3.25981	0.837133	BS	Non-significant	Down	0.145501
ASV6501	-2.06161	0	BS	Non-significant	Down	1
ASV651	-4.63297	0.817272	BS	Non-significant	Down	0.15231
ASV6585	-6.33159	3.31698	BS	Significant	Down	0.000481974
ASV6589	-3.87271	0.767114	BS	Non-significant	Down	0.170957
ASV6594	-2.61398	0	BS	Non-significant	Down	1
ASV6605	-3.05016	0	BS	Non-significant	Down	1
ASV6647	-2.86909	0	BS	Non-significant	Down	1
ASV6865	4.45618	1.22289	BC	Non-significant	Up	0.0598569
ASV687	7.52995	4.87935	BC	Significant	Up	1.32022e-05
ASV6901	-3.92596	0.798108	BS	Non-significant	Down	0.159181
ASV6995	-3.40299	0	BS	Non-significant	Down	1
ASV6996	-5.83986	1.5486	BS	Significant	Down	0.0282746
ASV7005	-0.704342	0	BS	Non-significant	Down	1
ASV7058	1.11742	0.202019	BC	Non-significant	Up	0.628031
ASV712	-5.35895	0.798108	BS	Non-significant	Down	0.159181
ASV7138	-5.1767	1.17831	BS	Non-significant	Down	0.0663273
ASV7188	6.51031	2.07542	BC	Significant	Up	0.00840591
ASV722	-8.79357	5.77521	BS	Significant	Down	1.67797e-06
ASV7226	-4.01846	0	BS	Non-significant	Down	1
ASV7239	-7.30239	4.73817	BS	Significant	Down	1.82738e-05
ASV7295	-7.8307	5.48609	BS	Significant	Down	3.2652e-06
ASV7300	-7.88568	5.28428	BS	Significant	Down	5.19663e-06
ASV7472	5.12345	1.66334	BC	Significant	Up	0.0217102
ASV7493	-4.08294	0	BS	Non-significant	Down	1
ASV7558	-5.48431	1.99717	BS	Significant	Down	0.0100653
ASV7571	-3.60251	1.13195	BS	Non-significant	Down	0.0737996
ASV7674	-3.07917	0	BS	Non-significant	Down	1
ASV770	-2.58373	0	BS	Non-significant	Down	1
ASV7700	-1.95694	0	BS	Non-significant	Down	1
ASV7706	19.7942	13.8601	BC	Significant	Up	1.38016e-14
ASV773	-2.18986	0	BS	Non-significant	Down	1
ASV775	-2.77744	0	BS	Non-significant	Down	1
ASV7754	7.49064	3.31698	BC	Significant	Up	0.000481974
ASV7761	-8.08568	5.80032	BS	Significant	Down	1.58374e-06
ASV7796	4.178	1.18832	BC	Non-significant	Up	0.0648157
ASV7801	-4.84493	0.799578	BS	Non-significant	Down	0.158643
ASV7833	-2.03634	0	BS	Non-significant	Down	1
ASV7870	-6.56064	2.39654	BS	Significant	Down	0.00401294
ASV788	-4.32062	0.644236	BS	Non-significant	Down	0.226863
ASV7930	1.52719	0.436776	BC	Non-significant	Up	0.365784
ASV7932	21.6007	19.2542	BC	Significant	Up	5.56917e-20
ASV7999	-9.74164	7.06325	BS	Significant	Down	8.64465e-08
ASV8009	6.36739	1.79221	BC	Significant	Up	0.0161357
ASV8021	-4.89952	1.00031	BS	Non-significant	Down	0.0999282
ASV8095	-3.77966	0.433766	BS	Non-significant	Down	0.368327
ASV8144	-3.7292	0.513048	BS	Non-significant	Down	0.306868
ASV8173	-2.17201	0	BS	Non-significant	Down	1
ASV8199	6.0548	1.71282	BC	Significant	Up	0.0193723
ASV82	-5.14035	0.813346	BS	Non-significant	Down	0.153693
ASV8208	-2.09684	0	BS	Non-significant	Down	1
ASV8250	-1.2824	0	BS	Non-significant	Down	1
ASV8333	-5.34437	1.00031	BS	Non-significant	Down	0.0999282
ASV8351	-5.19651	0.828478	BS	Non-significant	Down	0.14843
ASV8533	22.5683	22.481	BC	Significant	Up	3.30397e-23
ASV8553	-5.29613	1.92626	BS	Significant	Down	0.0118506
ASV8602	-2.06246	0	BS	Non-significant	Down	1
ASV8625	21.6627	24.1667	BC	Significant	Up	6.81258e-25
ASV8748	-5.99128	1.78265	BS	Significant	Down	0.0164951
ASV8756	-2.36581	0	BS	Non-significant	Down	1
ASV8838	-3.62306	0	BS	Non-significant	Down	1
ASV890	-1.71681	0.158219	BS	Non-significant	Down	0.694674
ASV8956	-1.94243	0	BS	Non-significant	Down	1
ASV8961	-4.92327	0.926248	BS	Non-significant	Down	0.118509
ASV9047	5.77291	1.64274	BC	Significant	Up	0.0227648
ASV9168	-6.10761	0.815991	BS	Non-significant	Down	0.15276
ASV9220	-1.86449	0.23517	BS	Non-significant	Down	0.581876
ASV928	-1.77556	0	BS	Non-significant	Down	1
ASV930	7.78089	5.45661	BC	Significant	Up	3.49455e-06
ASV9371	5.01563	1.90167	BC	Significant	Up	0.0125409
ASV9447	-2.29265	0	BS	Non-significant	Down	1
ASV9452	-0.267546	0.0515044	BS	Non-significant	Down	0.888169
ASV947	-7.84678	4.57329	BS	Significant	Down	2.6712e-05
ASV9571	-7.80786	5.39147	BS	Significant	Down	4.06001e-06
ASV9581	-1.58224	0	BS	Non-significant	Down	1
ASV9607	-6.05894	1.62993	BS	Significant	Down	0.0234461
ASV9699	13.9686	38.5496	BC	Significant	Up	2.82083e-39
ASV9714	-6.04254	2.29671	BS	Significant	Down	0.00505
ASV9756	-0.133785	0.0139169	BS	Non-significant	Down	0.968463
ASV9821	-4.09236	0.836754	BS	Non-significant	Down	0.145628
ASV9836	-8.07544	5.87796	BS	Significant	Down	1.32446e-06
ASV987	4.0392	1.75505	BC	Significant	Up	0.0175771
ASV9943	-8.88685	6.75293	BS	Significant	Down	1.76632e-07
ASV9970	-3.94511	0	BS	Non-significant	Down	1
ASV9986	21.5372	10.1784	BC	Significant	Up	6.63068e-11
ASV9998	-6.56868	2.72775	BS	Significant	Down	0.00187178

## Sheet: Table S5
Biomarkernames	Log10AverageAbundance	EnrichedGroups	LDA	KW_Pvalue
d__Bacteria.p__Pseudomonadota.c__Gammaproteobacteria.o__Pseudomonadales.f__Endozoicomonadaceae.g__Endozoicomonas	5.45898	MC	4.67977	0.0142029
d__Bacteria.p__Pseudomonadota.c__Gammaproteobacteria.o__Pseudomonadales.f__Halomonadaceae.g__Halomonas	3.4155			0.010424
d__Bacteria.p__Myxococcota.c__Myxococcia.o__Myxococcales.f__Myxococcaceae.g__P3OB_42	4.25196	BC	3.78825	0.0128127
d__Bacteria.p__Pseudomonadota.c__Gammaproteobacteria.o__Pseudomonadales.f__OM182_clade.g__Incertae_Sedis	2.52712			0.0203904
d__Bacteria.p__Pseudomonadota.c__Alphaproteobacteria.o__Rhodobacterales.f__Paracoccaceae.__	4.43368	BC	3.99832	0.00233003
d__Bacteria.p__Spirochaetota.c__Spirochaetia.o__Spirochaetales.f__Spirochaetaceae.g__Spirochaeta	3.79992	BC	3.65079	0.00294448
d__Bacteria.p__Pseudomonadota.c__Gammaproteobacteria.o__Enterobacterales.f__Pseudoalteromonadaceae.g__Algicola	4.40617	MC	3.89577	0.00122322
d__Bacteria.p__Pseudomonadota.c__Gammaproteobacteria.o__Enterobacterales.f__Alteromonadaceae.g__Incertae_Sedis	3.10869			0.022564
d__Bacteria.p__Pseudomonadota.c__Gammaproteobacteria.o__Pseudomonadales.f__Porticoccaceae.g__SAR92_clade	1.80139			5.42275e-05
d__Bacteria.p__Actinomycetota.c__Actinobacteria.o__Mycobacteriales.f__Mycobacteriaceae.g__Mycobacterium	3.43167			0.000170384
d__Bacteria.p__Pseudomonadota.c__Gammaproteobacteria.o__Burkholderiales.f__Alcaligenaceae.g__Achromobacter	2.78293			0.0131512
d__Bacteria.p__Pseudomonadota.c__Gammaproteobacteria.o__Pseudomonadales.f__Endozoicomonadaceae.g__Parendozoicomonas	4.05691	MC	3.70166	3.77903e-08
d__Bacteria.p__Pseudomonadota.c__Gammaproteobacteria.o__Pseudomonadales.f__Pseudohongiellaceae.g__Pseudohongiella	2.28265			0.00347063
d__Bacteria.p__Bacteroidota.c__Bacteroidia.o__Flavobacteriales.f__Flavobacteriaceae.g__Mesoflavibacter	3.59735			0.016002
d__Bacteria.p__Pseudomonadota.c__Gammaproteobacteria.o__Enterobacterales.f__Idiomarinaceae.__	1.47194			0.0347683
d__Bacteria.p__Pseudomonadota.c__Gammaproteobacteria.o__Pseudomonadales.f__Moraxellaceae.g__Psychrobacter	3.29634			0.00494018
d__Bacteria.p__Pseudomonadota.c__Gammaproteobacteria.o__Enterobacterales.f__Pseudoalteromonadaceae.__	2.68499			0.045081
d__Bacteria.p__Bacteroidota.c__Bacteroidia.o__Cytophagales.f__Amoebophilaceae.g__Candidatus_Amoebophilus	4.64938	BC	4.23375	0.000274946
d__Bacteria.p__Pseudomonadota.c__Gammaproteobacteria.o__Nitrosococcales.f__Nitrosococcaceae.__	1.75405			0.0112652
d__Bacteria.p__Thermodesulfobacteriota.__.__.__.__	0.752691			0.0279946
d__Bacteria.p__Bacteroidota.c__Bacteroidia.o__Flavobacteriales.f__Flavobacteriaceae.g__Winogradskyella	2.67952			9.37445e-05
d__Bacteria.p__Bacillota.c__Clostridia.o__Oscillospirales.f__Ruminococcaceae.g__Faecalibacterium	1.9655			0.0119995
d__Bacteria.p__Candidatus_Eremiobacterota.c__Eremiobacteria.o__Incertae_Sedis.f__Incertae_Sedis.g__Incertae_Sedis	2.20555			0.0208259
d__Bacteria.p__Pseudomonadota.c__Gammaproteobacteria.o__Enterobacterales.f__Alteromonadaceae.__	3.23259			0.00863003
d__Bacteria.p__Bacillota.c__Clostridia.o__Lachnospirales.f__Lachnospiraceae.g__Blautia	2.04793			0.0108615
d__Bacteria.p__Cyanobacteriota.c__Sericytochromatia.o__Incertae_Sedis.f__Incertae_Sedis.g__Incertae_Sedis	2.07493			0.00179721
d__Bacteria.p__Bacillota.c__Bacilli.o__Exiguobacterales.f__Exiguobacteraceae.g__Exiguobacterium	3.4508			0.0451831
d__Bacteria.p__Pseudomonadota.c__Alphaproteobacteria.o__Caulobacterales.f__Caulobacteraceae.g__Asticcacaulis	2.07046			0.0219465
d__Bacteria.p__Pseudomonadota.c__Gammaproteobacteria.o__Pseudomonadales.f__Endozoicomonadaceae.__	3.4121			0.0287072
d__Bacteria.p__Cyanobacteriota.c__Cyanobacteriia.o__Synechococcales.f__Cyanobiaceae.g__Synechococcus_CC9902	3.36072			0.0197265
d__Bacteria.p__Bacteroidota.c__Bacteroidia.o__Cytophagales.f__Flammeovirgaceae.g__Xanthovirga	1.32018			0.00695117
d__Bacteria.p__Bacteroidota.c__Bacteroidia.o__Flavobacteriales.f__Cryomorphaceae.__	1.54216			0.0112278
d__Bacteria.p__Pseudomonadota.c__Alphaproteobacteria.o__Rhodospirillales.f__Terasakiellaceae.g__Terasakiella	2.68747			0.00285535
d__Bacteria.p__Bdellovibrionota.c__Bdellovibrionia.o__Bdellovibrionales.f__Pseudobdellovibrionaceae.g__Incertae_Sedis	2.23643			0.0369662
d__Bacteria.p__Pseudomonadota.c__Gammaproteobacteria.o__Pseudomonadales.f__Halomonadaceae.g__Chromohalobacter	2.17814			0.000580853
d__Bacteria.p__Pseudomonadota.c__Gammaproteobacteria.o__Pseudomonadales.f__Halomonadaceae.g__Salinicola	2.00461			0.0381011
d__Bacteria.p__Pseudomonadota.c__Alphaproteobacteria.o__Rhodospirillales.f__Rhodospirillaceae.__	0.976893			0.0279946
d__Bacteria.p__Actinomycetota.c__Actinobacteria.o__Bifidobacteriales.f__Bifidobacteriaceae.g__Bifidobacterium	2.45989			0.000211543
d__Bacteria.p__Pseudomonadota.c__Gammaproteobacteria.o__Pseudomonadales.f__Halomonadaceae.__	0.906003			0.0279946
d__Bacteria.p__Pseudomonadota.c__Gammaproteobacteria.o__Incertae_Sedis.f__Incertae_Sedis.g__Incertae_Sedis	2.17579			0.0229069
d__Bacteria.p__Pseudomonadota.c__Alphaproteobacteria.o__Rhodobacterales.f__Paracoccaceae.g__Roseobacter_clade_CHAB_I_5_lineage	2.26673			0.0168767
d__Bacteria.p__Pseudomonadota.c__Gammaproteobacteria.o__Pseudomonadales.f__Marinobacteraceae.g__Marinobacter	3.02102			0.00187066
d__Bacteria.p__Pseudomonadota.c__Gammaproteobacteria.o__Burkholderiales.f__Burkholderiaceae.g__Burkholderia_Caballeronia_Paraburkholderia	2.07537			0.0398669
d__Bacteria.p__Fusobacteriota.c__Fusobacteriia.o__Fusobacteriales.f__Fusobacteriaceae.g__Cetobacterium	2.54184			0.000113257
d__Bacteria.p__Pseudomonadota.c__Gammaproteobacteria.o__Burkholderiales.f__Comamonadaceae.g__Acidovorax	3.20391			0.0246319
d__Bacteria.p__Pseudomonadota.c__Gammaproteobacteria.o__Burkholderiales.f__Oxalobacteraceae.g__Duganella	0.683832			0.0279946
d__Bacteria.p__Pseudomonadota.c__Gammaproteobacteria.o__Enterobacterales.f__Pseudoalteromonadaceae.g__Psychrosphaera	3.4484			0.0163631
d__Bacteria.p__Pseudomonadota.c__Gammaproteobacteria.o__Pseudomonadales.f__Saccharospirillaceae.g__Bacterioplanoides	3.39351			0.000404846
d__Bacteria.p__Bacteroidota.c__Bacteroidia.o__Bacteroidales.f__Marinilabiliaceae.g__Carboxylicivirga	2.11031			0.0129396
d__Bacteria.p__Pseudomonadota.c__Gammaproteobacteria.o__Pseudomonadales.f__Halomonadaceae.g__Cobetia	3.20001			6.92207e-05
d__Bacteria.p__Patescibacteria.c__Parcubacteria.o__Candidatus_Kaiserbacteria.f__Incertae_Sedis.g__Incertae_Sedis	1.69798			0.0259449
d__Bacteria.p__Thermodesulfobacteriota.c__Desulfuromonadia.o__PB19.f__Incertae_Sedis.g__Incertae_Sedis	2.01306			0.0241593
d__Bacteria.p__Cyanobacteriota.c__Cyanobacteriia.o__Cyanobacteriales.f__Xenococcaceae.g__Incertae_Sedis	1.81353			0.0428288
d__Bacteria.p__Pseudomonadota.c__Alphaproteobacteria.o__Caulobacterales.f__Caulobacteraceae.g__Incertae_Sedis	1.33776			0.044183
d__Bacteria.p__Pseudomonadota.c__Gammaproteobacteria.o__Pseudomonadales.f__Nitrincolaceae.__	2.96995			0.0214777
d__Bacteria.p__Planctomycetota.c__028H05_P_BN_P5.o__Incertae_Sedis.f__Incertae_Sedis.g__Incertae_Sedis	1.17245			0.0311384
d__Bacteria.p__Pseudomonadota.c__Alphaproteobacteria.o__Kiloniellales.f__Kiloniellaceae.g__Thalassocola	2.4104			0.00463413
d__Bacteria.p__Pseudomonadota.c__Gammaproteobacteria.o__EPR3968_O8a_Bc78.f__Incertae_Sedis.g__Incertae_Sedis	2.09517			0.0120094
d__Bacteria.p__Pseudomonadota.c__Alphaproteobacteria.o__Rhodobacterales.f__Paracoccaceae.g__Silicimonas	2.94296			0.0254957
d__Bacteria.p__Pseudomonadota.c__Alphaproteobacteria.o__Caulobacterales.f__Hyphomonadaceae.g__Hellea	1.33738			0.0428288
d__Bacteria.p__Pseudomonadota.c__Alphaproteobacteria.o__Rickettsiales.f__Rickettsiaceae.g__Candidatus_Megaira	2.05037			0.0130087
d__Bacteria.p__Pseudomonadota.c__Alphaproteobacteria.o__Hyphomicrobiales.f__Rhizobiaceae.g__Pseudahrensia	2.69074			0.0209433
d__Bacteria.p__Bacteroidota.c__Bacteroidia.o__Cytophagales.f__Flammeovirgaceae.g__Flexithrix	1.98305			0.0268285
d__Bacteria.p__Bacteroidota.c__Bacteroidia.o__Cytophagales.f__Amoebophilaceae.g__Incertae_Sedis	2.24799			0.0187353
d__Bacteria.p__Rhodothermota.c__Rhodothermia.o__Rhodothermales.f__Rhodothermaceae.g__Incertae_Sedis	2.36791			0.0371209
d__Bacteria.p__Actinomycetota.c__Actinobacteria.o__Micrococcales.f__Microbacteriaceae.g__Agromyces	2.45462			0.00247256
d__Bacteria.p__Actinomycetota.c__Actinobacteria.o__Micrococcales.f__Dermabacteraceae.g__Brachybacterium	2.21392			0.00123805
d__Bacteria.p__Pseudomonadota.c__Gammaproteobacteria.o__Francisellales.f__Francisellaceae.g__Cysteiniphilum	1.82188			0.0129396
d__Bacteria.p__Pseudomonadota.c__Gammaproteobacteria.o__Enterobacterales.f__Vibrionaceae.g__Paraphotobacterium	1.37944			0.0473614
d__Bacteria.p__Bacteroidota.c__Bacteroidia.o__Flavobacteriales.f__Cryomorphaceae.g__NS10_marine_group	1.81443			0.00914002
d__Bacteria.p__Bacteroidota.c__Bacteroidia.o__Flavobacteriales.f__Flavobacteriaceae.g__Aquimarina	2.56553			0.016928
d__Bacteria.p__Actinomycetota.c__Acidimicrobiia.o__Microtrichales.f__Microtrichaceae.__	1.62532			0.0347683
d__Bacteria.p__Pseudomonadota.c__Alphaproteobacteria.o__Sphingomonadales.f__Sphingomonadaceae.g__Parasphingorhabdus	1.40001			0.00695117
d__Bacteria.p__Verrucomicrobiota.c__Verrucomicrobiia.o__Opitutales.f__Puniceicoccaceae.g__Pelagicoccus	1.37219			0.0428288
d__Bacteria.p__Pseudomonadota.c__Gammaproteobacteria.o__Thiomicrospirales.f__Thiomicrospiraceae.g__endosymbionts	1.56658			0.044183
d__Bacteria.p__Pseudomonadota.c__Gammaproteobacteria.o__Pseudomonadales.f__Saccharospirillaceae.g__Oleispira	2.64046			0.0274164
d__Bacteria.p__Bacillota.c__Bacilli.o__Erysipelotrichales.f__Erysipelotrichaceae.g__Breznakia	1.60703			0.0403
d__Bacteria.p__Pseudomonadota.c__Alphaproteobacteria.o__Puniceispirillales.f__Incertae_Sedis.g__Incertae_Sedis	1.26974			0.038947
d__Bacteria.p__Pseudomonadota.c__Alphaproteobacteria.o__Kiloniellales.f__Kiloniellaceae.g__Kiloniella	2.22187			0.023442
d__Bacteria.p__Bacillota.c__Incertae_Sedis.o__Incertae_Sedis.f__Incertae_Sedis.g__Incertae_Sedis	0.761009			0.0279946
d__Bacteria.p__Cyanobacteriota.c__Vampirivibrionia.o__Obscuribacterales.f__Obscuribacteraceae.g__Incertae_Sedis	2.35006			0.034613
d__Bacteria.p__Pseudomonadota.c__Alphaproteobacteria.o__Rhodobacterales.f__Paracoccaceae.g__Planktotalea	1.8958			0.0128178
d__Bacteria.p__Pseudomonadota.c__Alphaproteobacteria.o__Hyphomicrobiales.f__Stappiaceae.g__Incertae_Sedis	1.92144			0.0233178
d__Bacteria.p__Pseudomonadota.c__Alphaproteobacteria.o__Parvibaculales.f__Parvibaculaceae.g__Incertae_Sedis	1.4488			0.0398669
d__Bacteria.p__Bacteroidota.c__Bacteroidia.o__Flavobacteriales.f__Flavobacteriaceae.g__Nonlabens	2.90126			0.00721282
d__Bacteria.p__Pseudomonadota.c__Alphaproteobacteria.o__Kiloniellales.f__Fodinicurvataceae.g__Fodinicurvata	1.08554			0.0455731
d__Bacteria.p__Bacteroidota.c__Bacteroidia.o__Flavobacteriales.f__Flavobacteriaceae.g__Mesonia	2.34177			0.00983901
d__Bacteria.p__Pseudomonadota.c__Gammaproteobacteria.o__Pseudomonadales.f__Saccharospirillaceae.g__Thalassolituus	3.34676			0.0206979
d__Bacteria.p__Pseudomonadota.c__Gammaproteobacteria.o__Pseudomonadales.f__Moraxellaceae.g__Moraxella	0.762945			0.0279946
d__Bacteria.p__Bacillota.c__Clostridia.o__Lachnospirales.f__Lachnospiraceae.g__Dorea	1.80166			0.00695117
d__Bacteria.p__Bacteroidota.c__Bacteroidia.o__Flavobacteriales.f__Flavobacteriaceae.g__Aureitalea	1.18981			0.00695117
d__Bacteria.p__Rhodothermota.c__Rhodothermia.o__Rhodothermales.f__Rhodothermaceae.__	0.85469			0.0279946
d__Bacteria.p__Patescibacteria.c__ABY1.o__Candidatus_Uhrbacteria.f__Incertae_Sedis.g__Incertae_Sedis	0.841038			0.00695117
d__Bacteria.p__Bacteroidota.c__Bacteroidia.o__Sphingobacteriales.f__NS11_12_marine_group.g__Incertae_Sedis	1.52025			0.0262569
d__Bacteria.p__Bacillota.c__Clostridia.o__Lachnospirales.f__Lachnospiraceae.g__Cellulosilyticum	2.24877			0.0360295
d__Bacteria.p__Pseudomonadota.c__Gammaproteobacteria.o__Nitrosococcales.f__Methylophagaceae.g__Methylophaga	2.56039			0.0331974
d__Bacteria.p__Pseudomonadota.c__Gammaproteobacteria.o__Pseudomonadales.f__Thioglobaceae.__	1.80084			0.0279946
d__Bacteria.p__Pseudomonadota.c__Gammaproteobacteria.o__Lysobacterales.f__Lysobacteraceae.g__Arenimonas	1.37716			0.0279946
d__Bacteria.p__Pseudomonadota.c__Gammaproteobacteria.o__Lysobacterales.f__Rhodanobacteraceae.g__Luteibacter	1.58367			0.00695117
d__Bacteria.p__Bacillota.c__Bacilli.o__Erysipelotrichales.f__Erysipelotrichaceae.g__Dielma	1.97723			0.029971
d__Bacteria.p__Campylobacterota.c__Campylobacteria.o__Campylobacterales.f__Sulfurovaceae.g__Sulfurovum	1.09078			0.0279946
d__Bacteria.p__Bdellovibrionota.c__Oligoflexia.o__Silvanigrellales.f__Silvanigrellaceae.g__Incertae_Sedis	0.778326			0.0279946
d__Bacteria.p__Pseudomonadota.c__Gammaproteobacteria.o__Salinisphaerales.f__Nevskiaceae.g__Nevskia	1.14969			0.044183
d__Bacteria.p__Cyanobacteriota.c__Cyanobacteriia.o__Cyanobacteriales.f__Prochloraceae.g__Prochloron_P1_Palau	1.98335			0.00177212
d__Bacteria.p__Planctomycetota.c__Planctomycetes.o__Pirellulales.f__Pirellulaceae.__	1.30024			0.044183
d__Bacteria.p__Bacteroidota.c__Bacteroidia.o__Flavobacteriales.f__Flavobacteriaceae.g__Corallibacter	1.38017			0.0428288
d__Bacteria.p__Pseudomonadota.c__Gammaproteobacteria.o__Steroidobacterales.f__Steroidobacteraceae.g__Steroidobacter	1.73529			0.0279946
d__Bacteria.p__Bacteroidota.c__Bacteroidia.o__Flavobacteriales.f__Crocinitomicaceae.g__Lishizhenia	1.67259			0.0347683
d__Bacteria.p__Pseudomonadota.c__Gammaproteobacteria.o__Pseudomonadales.f__Saccharospirillaceae.__	1.30003			0.0279946
d__Bacteria.p__Planctomycetota.c__Planctomycetes.o__Pirellulales.f__Pirellulaceae.g__Rubripirellula	0.848437			0.0279946
d__Bacteria.p__Pseudomonadota.c__Alphaproteobacteria.o__Rhodobacterales.f__Paracoccaceae.g__Ponticoccus	1.35479			0.0279946
d__Bacteria.p__Pseudomonadota.c__Gammaproteobacteria.o__EV818SWSAP88.f__Incertae_Sedis.g__Incertae_Sedis	1.36688			0.044183
d__Bacteria.p__Pseudomonadota.c__Alphaproteobacteria.o__Acetobacterales.f__Acetobacteraceae.__	0.819639			0.0279946
d__Bacteria.p__Pseudomonadota.c__Alphaproteobacteria.o__Parvibaculales.f__Incertae_Sedis.g__Incertae_Sedis	1.7082			0.0124027
d__Bacteria.p__Pseudomonadota.c__Alphaproteobacteria.o__Elsterales.f__Elsteraceae.g__Elstera	2.29656			0.0133271
d__Bacteria.p__Patescibacteria.c__Parcubacteria.o__Incertae_Sedis.f__Incertae_Sedis.g__Incertae_Sedis	0.779711			0.0279946
d__Bacteria.p__Pseudomonadota.c__Gammaproteobacteria.o__Arenicellales.f__Arenicellaceae.g__Perspicuibacter	1.1735			0.00695117
d__Bacteria.p__Pseudomonadota.c__Gammaproteobacteria.o__Thiomicrospirales.f__Thiomicrospiraceae.g__Thiomicrorhabdus	1.61709			0.0279946
d__Bacteria.p__Pseudomonadota.c__Gammaproteobacteria.o__Pseudomonadales.f__Saccharospirillaceae.g__Litoribrevibacter	1.66852			0.0360295
d__Bacteria.p__Myxococcota.c__Polyangiia.o__Nannocystales.f__Nannocystaceae.__	1.40782			0.0279946
d__Bacteria.p__Pseudomonadota.c__Alphaproteobacteria.o__Rhodobacterales.f__Paracoccaceae.g__Pelagibaca	1.48981			0.0279946
d__Bacteria.p__Actinomycetota.c__Actinobacteria.o__Micrococcales.f__Demequinaceae.g__Demequina	1.04433			0.0279946
d__Bacteria.p__Pseudomonadota.c__Alphaproteobacteria.o__Rhodobacterales.f__Paracoccaceae.g__Sagittula	3.2378			0.000622862
d__Bacteria.p__Bacteroidota.c__Bacteroidia.o__Flavobacteriales.f__Flavobacteriaceae.g__Aureivirga	1.57326			0.0360295
d__Bacteria.p__Pseudomonadota.c__Gammaproteobacteria.o__Enterobacterales.f__Gallaecimonadaceae.g__Gallaecimonas	1.376			0.0279946
d__Bacteria.p__Campylobacterota.c__Campylobacteria.o__Campylobacterales.__.__	1.50359			0.0279946
d__Bacteria.p__Pseudomonadota.c__Gammaproteobacteria.o__Cardiobacteriales.f__Cardiobacteriaceae.g__Suttonella	1.25219			0.0279946
d__Bacteria.p__Actinomycetota	4.23242	BC	3.50259	0.0278716
d__Bacteria.p__Pseudomonadota	5.88262	MC	4.53395	0.0401739
d__Bacteria.p__Pseudomonadota.c__Alphaproteobacteria	5.02721	BC	4.26855	0.0363495
d__Bacteria.p__Pseudomonadota.c__Alphaproteobacteria.o__Rhodobacterales	4.68815	BC	4.10336	0.0124087
d__Bacteria.p__Pseudomonadota.c__Alphaproteobacteria.o__Rhodobacterales.f__Paracoccaceae	4.68815	BC	4.10336	0.0124087
d__Bacteria.p__Pseudomonadota.c__Gammaproteobacteria	5.83959	MC	4.71213	0.0239986
d__Bacteria.p__Pseudomonadota.c__Gammaproteobacteria.o__Pseudomonadales.f__Endozoicomonadaceae	5.47971	MC	4.72807	0.0054866
d__Bacteria.p__Pseudomonadota.c__Gammaproteobacteria.o__Pseudomonadales.f__Halomonadaceae	3.71143			0.000544335
d__Bacteria.p__Actinomycetota.c__Actinobacteria	4.17658			0.0272108
d__Bacteria.p__Bacteroidota	4.9149	BC	4.42868	0.000966027
d__Bacteria.p__Bacteroidota.c__Bacteroidia	4.9149	BC	4.42868	0.000966027
d__Bacteria.p__Myxococcota	4.28634	BC	3.8183	0.0064463
d__Bacteria.p__Myxococcota.c__Myxococcia	4.25205	BC	3.78787	0.0234353
d__Bacteria.p__Myxococcota.c__Myxococcia.o__Myxococcales	4.25205	BC	3.78757	0.0234353
d__Bacteria.p__Myxococcota.c__Myxococcia.o__Myxococcales.f__Myxococcaceae	4.25205	BC	3.78506	0.0234353
d__Bacteria.p__Pseudomonadota.c__Gammaproteobacteria.o__Pseudomonadales.f__OM182_clade	2.52712			0.0203904
d__Bacteria.p__Bacteroidota.c__Bacteroidia.o__Flavobacteriales	4.46664	BC	3.94949	0.020501
d__Bacteria.p__Bacteroidota.c__Bacteroidia.o__Flavobacteriales.f__Flavobacteriaceae	4.41613	BC	3.91101	0.0133669
d__Bacteria.p__Actinomycetota.c__Actinobacteria.o__Mycobacteriales	3.68523			0.00534567
d__Bacteria.p__Pseudomonadota.c__Alphaproteobacteria.o__Kiloniellales	3.33622			0.0364139
d__Bacteria.p__Pseudomonadota.c__Alphaproteobacteria.o__Kiloniellales.f__Kiloniellaceae	3.3317			0.0208088
d__Bacteria.p__Pseudomonadota.c__Gammaproteobacteria.o__Pseudomonadales.f__Porticoccaceae	2.55196			0.0055515
d__Bacteria.p__Pseudomonadota.c__Gammaproteobacteria.o__Ectothiorhodospirales.f__Ectothiorhodospiraceae	2.24314			0.044183
d__Bacteria.p__Actinomycetota.c__Actinobacteria.o__Mycobacteriales.f__Mycobacteriaceae	3.43167			0.000170384
d__Bacteria.p__Pseudomonadota.c__Alphaproteobacteria.o__Hyphomicrobiales	4.43798	BC	3.95284	0.0491114
d__Bacteria.p__Bacteroidota.c__Bacteroidia.o__Cytophagales	4.6803	BC	4.21564	0.0205788
d__Bacteria.p__Pseudomonadota.c__Gammaproteobacteria.o__Burkholderiales.f__Alcaligenaceae	2.79438			0.0225142
d__Bacteria.p__Pseudomonadota.c__Gammaproteobacteria.o__Pseudomonadales.f__Pseudohongiellaceae	2.28265			0.00347063
d__Bacteria.p__Thermodesulfobacteriota.c__Desulfuromonadia	2.52198			0.0167737
d__Bacteria.p__Pseudomonadota.c__Gammaproteobacteria.o__Steroidobacterales	2.99067			0.0247814
d__Bacteria.p__Patescibacteria	3.32957			0.0150136
d__Bacteria.p__Bacteroidota.c__Bacteroidia.o__Cytophagales.f__Amoebophilaceae	4.6511	BC	4.23628	0.000146123
d__Bacteria.p__Thermodesulfobacteriota.__	0.752691			0.0279946
d__Bacteria.p__Thermodesulfobacteriota.__.__	0.752691			0.0279946
d__Bacteria.p__Thermodesulfobacteriota.__.__.__	0.752691			0.0279946
d__Bacteria.p__Actinomycetota.c__Coriobacteriia	1.59684			0.0420877
d__Bacteria.p__Actinomycetota.c__Coriobacteriia.o__Coriobacteriales	1.59684			0.0420877
d__Bacteria.p__Pseudomonadota.c__Gammaproteobacteria.o__Arenicellales	2.57427			0.0251992
d__Bacteria.p__Pseudomonadota.c__Gammaproteobacteria.o__Arenicellales.f__Arenicellaceae	2.57427			0.0251992
d__Bacteria.p__Pseudomonadota.c__Alphaproteobacteria.o__Micavibrionales	2.48037			0.0316073
d__Bacteria.p__Pseudomonadota.c__Gammaproteobacteria.o__Immundisolibacterales	1.89305			0.0473614
d__Bacteria.p__Pseudomonadota.c__Gammaproteobacteria.o__Immundisolibacterales.f__Immundisolibacteraceae	1.89305			0.0473614
d__Bacteria.p__Bacillota.c__Clostridia.o__Peptostreptococcales_Tissierellales.f__Anaerovoracaceae	2.11739			0.0140087
d__Bacteria.p__Candidatus_Eremiobacterota	2.20555			0.0208259
d__Bacteria.p__Candidatus_Eremiobacterota.c__Eremiobacteria	2.20555			0.0208259
d__Bacteria.p__Candidatus_Eremiobacterota.c__Eremiobacteria.o__Incertae_Sedis	2.20555			0.0208259
d__Bacteria.p__Candidatus_Eremiobacterota.c__Eremiobacteria.o__Incertae_Sedis.f__Incertae_Sedis	2.20555			0.0208259
d__Bacteria.p__Pseudomonadota.c__Gammaproteobacteria.o__Nitrosococcales.f__Methylophagaceae	2.58891			0.0223956
d__Bacteria.p__Cyanobacteriota.c__Sericytochromatia	2.07493			0.00179721
d__Bacteria.p__Cyanobacteriota.c__Sericytochromatia.o__Incertae_Sedis	2.07493			0.00179721
d__Bacteria.p__Cyanobacteriota.c__Sericytochromatia.o__Incertae_Sedis.f__Incertae_Sedis	2.07493			0.00179721
d__Bacteria.p__Bacillota.c__Bacilli.o__Exiguobacterales	3.4508			0.0451831
d__Bacteria.p__Bacillota.c__Bacilli.o__Exiguobacterales.f__Exiguobacteraceae	3.4508			0.0451831
d__Bacteria.p__Pseudomonadota.c__Alphaproteobacteria.o__Rhodospirillales.f__Terasakiellaceae	3.02891			0.010181
d__Bacteria.p__Bacillota.c__Bacilli.o__Bacillales.f__Planococcaceae	2.8563			0.0416197
d__Bacteria.p__Pseudomonadota.c__Alphaproteobacteria.o__Rhodospirillales.f__Rhodospirillaceae	1.82478			0.0292235
d__Bacteria.p__Actinomycetota.c__Actinobacteria.o__Bifidobacteriales	2.45989			0.000211543
d__Bacteria.p__Actinomycetota.c__Actinobacteria.o__Bifidobacteriales.f__Bifidobacteriaceae	2.45989			0.000211543
d__Bacteria.p__Patescibacteria.c__ABY1	1.87499			0.0119596
d__Bacteria.p__Pseudomonadota.c__Gammaproteobacteria.o__Incertae_Sedis	2.17579			0.0229069
d__Bacteria.p__Pseudomonadota.c__Gammaproteobacteria.o__Incertae_Sedis.f__Incertae_Sedis	2.17579			0.0229069
d__Bacteria.p__Pseudomonadota.c__Gammaproteobacteria.o__Pseudomonadales.f__Marinobacteraceae	3.02102			0.00187066
d__Bacteria.p__Fusobacteriota	2.93274			0.0265291
d__Bacteria.p__Fusobacteriota.c__Fusobacteriia	2.93274			0.0265291
d__Bacteria.p__Fusobacteriota.c__Fusobacteriia.o__Fusobacteriales	2.93274			0.0265291
d__Bacteria.p__Fusobacteriota.c__Fusobacteriia.o__Fusobacteriales.f__Fusobacteriaceae	2.88096			0.0313952
d__Bacteria.p__Patescibacteria.c__Parcubacteria	2.41529			0.0185567
d__Bacteria.p__Patescibacteria.c__Parcubacteria.o__Candidatus_Kaiserbacteria	1.69798			0.0259449
d__Bacteria.p__Patescibacteria.c__Parcubacteria.o__Candidatus_Kaiserbacteria.f__Incertae_Sedis	1.69798			0.0259449
d__Bacteria.p__Bacillota.c__Bacilli.o__Erysipelotrichales	2.70861			0.00726583
d__Bacteria.p__Bacillota.c__Bacilli.o__Erysipelotrichales.f__Erysipelotrichaceae	2.70721			0.00754758
d__Bacteria.p__Thermodesulfobacteriota.c__Desulfuromonadia.o__PB19	2.01306			0.0241593
d__Bacteria.p__Thermodesulfobacteriota.c__Desulfuromonadia.o__PB19.f__Incertae_Sedis	2.01306			0.0241593
d__Bacteria.p__Planctomycetota.c__028H05_P_BN_P5	1.17245			0.0311384
d__Bacteria.p__Planctomycetota.c__028H05_P_BN_P5.o__Incertae_Sedis	1.17245			0.0311384
d__Bacteria.p__Planctomycetota.c__028H05_P_BN_P5.o__Incertae_Sedis.f__Incertae_Sedis	1.17245			0.0311384
d__Bacteria.p__Pseudomonadota.c__Gammaproteobacteria.o__EPR3968_O8a_Bc78	2.09517			0.0120094
d__Bacteria.p__Pseudomonadota.c__Gammaproteobacteria.o__EPR3968_O8a_Bc78.f__Incertae_Sedis	2.09517			0.0120094
d__Bacteria.p__Rhodothermota	2.38104			0.00709216
d__Bacteria.p__Rhodothermota.c__Rhodothermia	2.38104			0.00709216
d__Bacteria.p__Rhodothermota.c__Rhodothermia.o__Rhodothermales	2.38104			0.00709216
d__Bacteria.p__Rhodothermota.c__Rhodothermia.o__Rhodothermales.f__Rhodothermaceae	2.38104			0.00709216
d__Bacteria.p__Actinomycetota.c__Actinobacteria.o__Micrococcales.f__Dermabacteraceae	2.22498			0.00265833
d__Bacteria.p__Pseudomonadota.c__Gammaproteobacteria.o__Thiomicrospirales	1.8936			0.00331782
d__Bacteria.p__Pseudomonadota.c__Gammaproteobacteria.o__Thiomicrospirales.f__Thiomicrospiraceae	1.8936			0.00331782
d__Bacteria.p__Pseudomonadota.c__Alphaproteobacteria.o__Puniceispirillales.f__Incertae_Sedis	1.26974			0.038947
d__Bacteria.p__Bacillota.c__Incertae_Sedis	0.761009			0.0279946
d__Bacteria.p__Bacillota.c__Incertae_Sedis.o__Incertae_Sedis	0.761009			0.0279946
d__Bacteria.p__Bacillota.c__Incertae_Sedis.o__Incertae_Sedis.f__Incertae_Sedis	0.761009			0.0279946
d__Bacteria.p__Cyanobacteriota.c__Vampirivibrionia.o__Obscuribacterales	2.36924			0.0261328
d__Bacteria.p__Cyanobacteriota.c__Vampirivibrionia.o__Obscuribacterales.f__Obscuribacteraceae	2.36924			0.0261328
d__Bacteria.p__Pseudomonadota.c__Gammaproteobacteria.o__Pseudomonadales.f__Thioglobaceae	2.04484			0.0279946
d__Bacteria.p__Patescibacteria.c__ABY1.o__Candidatus_Uhrbacteria	0.841038			0.00695117
d__Bacteria.p__Patescibacteria.c__ABY1.o__Candidatus_Uhrbacteria.f__Incertae_Sedis	0.841038			0.00695117
d__Bacteria.p__Bacteroidota.c__Bacteroidia.o__Sphingobacteriales.f__NS11_12_marine_group	1.52025			0.0262569
d__Bacteria.p__Campylobacterota.c__Campylobacteria.o__Campylobacterales.f__Sulfurovaceae	1.09078			0.0279946
d__Bacteria.p__Pseudomonadota.c__Gammaproteobacteria.o__Cardiobacteriales	1.59455			0.0381011
d__Bacteria.p__Pseudomonadota.c__Gammaproteobacteria.o__Cardiobacteriales.f__Wohlfahrtiimonadaceae	1.33125			0.0455731
d__Bacteria.p__Pseudomonadota.c__Gammaproteobacteria.o__Salinisphaerales.f__Nevskiaceae	1.14969			0.044183
d__Bacteria.p__Cyanobacteriota.c__Cyanobacteriia.o__Cyanobacteriales.f__Prochloraceae	1.98335			0.00177212
d__Bacteria.p__Pseudomonadota.c__Gammaproteobacteria.o__EV818SWSAP88	1.36688			0.044183
d__Bacteria.p__Pseudomonadota.c__Gammaproteobacteria.o__EV818SWSAP88.f__Incertae_Sedis	1.36688			0.044183
d__Bacteria.p__Pseudomonadota.c__Alphaproteobacteria.o__Parvibaculales.f__Incertae_Sedis	1.7082			0.0124027
d__Bacteria.p__Pseudomonadota.c__Alphaproteobacteria.o__Elsterales	2.29656			0.0247489
d__Bacteria.p__Pseudomonadota.c__Alphaproteobacteria.o__Elsterales.f__Elsteraceae	2.29656			0.0133271
d__Bacteria.p__Patescibacteria.c__Parcubacteria.o__Incertae_Sedis	0.779711			0.0279946
d__Bacteria.p__Patescibacteria.c__Parcubacteria.o__Incertae_Sedis.f__Incertae_Sedis	0.779711			0.0279946
d__Bacteria.p__Acidobacteriota.c__Acidobacteriae.o__Terriglobales	0.994216			0.0279946
d__Bacteria.p__Verrucomicrobiota.c__Omnitrophia.o__Omnitrophales	0.832734			0.0279946
d__Bacteria.p__Pseudomonadota.c__Gammaproteobacteria.o__Enterobacterales.f__Gallaecimonadaceae	1.376			0.0279946
d__Bacteria.p__Campylobacterota.c__Campylobacteria.o__Campylobacterales.__	1.50359			0.0279946

## Sheet: Table S6
level2_pathway_name	MC	BC
Amino acid metabolism	0.131393	0.128064
Biosynthesis of other secondary metabolites	0.023144	0.0224441
Carbohydrate metabolism	0.149949	0.149068
Cell motility	0.0183946	0.0219638
Cellular community - prokaryotes	0.0470474	0.0500729
Drug resistance: antimicrobial	0.015904	0.0166436
Energy metabolism	0.0722489	0.0718246
Folding, sorting and degradation	0.0223475	0.0230596
Glycan biosynthesis and metabolism	0.0208759	0.0205546
Infectious disease: bacterial	0.0133821	0.0133792
Lipid metabolism	0.0395647	0.0397067
Membrane transport	0.06361	0.0632352
Metabolism of cofactors and vitamins	0.0708479	0.072495
Metabolism of other amino acids	0.0288857	0.0286281
Metabolism of terpenoids and polyketides	0.0169263	0.0161899
Nucleotide metabolism	0.0425094	0.0423322
Replication and repair	0.037477	0.0384822
Signal transduction	0.0516493	0.0546977
Translation	0.0393596	0.0395807
Xenobiotics biodegradation and metabolism	0.032722	0.0315503
other	0.0617621	0.0599013

## Sheet: Table S8
Module label	MJ1	MJ2	MJ3	MJ4	MJ5
Taxa	g_SM1A02	p_NB1-j(unclassified)	g_Sphingobium	g_Alteromonas	g_Halomonas
	g_Pikeienuella	f_KI89A_clade	g_Aquabacterium	g_Vibrio	g_Mesoflavibacter
	g_Sva0996_marine_group	f_Sandaracinaceae	g_Simplicispira	g_Algicola	g_Oleibacter
	o_Chitinophagales_sp2	o_Thalassobaculales_sp2	g_Simplicispira	g_Photobacterium	g_Marinomonas
	c_Gammaproteobacteria_sp1	f_Cellvibrionaceae_sp2	g_Massilia	g_Pseudidiomarina	g_Marinobacter
	g_Actibacterium	g_Woeseia	g_Methylobacterium	g_Pseudoalteromonas	o_JGI_0000069-P22
	f_Saprospiraceae_sp2	c_OM190	g_Bradyrhizobium	g_Neptuniibacter	g_Chryseomicrobium
	g_Muricauda	g_Winogradskyella	g_Acidovorax	g_Marinobacterium	g_Bacterioplanoides
	f_PS1_clade	f_Microtrichaceae_sp2	o_Subgroup_7	o_Rhodospirillales_sp2	g_Tritonibacter
	f_Caldilineaceae	c_Subgroup_22	f_A0839	g_Arcobacter	g_Sulfitobacter
	g_Arenicella	f_Halieaceae_sp2	g_Rugosibacter	g_Thalassotalea	g_Neptunomonas
	c_Gammaproteobacteria_sp2	c_Gammaproteobacteria_sp3	g_Sphingopyxis	g_Oceanospirillum
	g_Portibacter	g_Pseudahrensia	f_Enterobacteriaceae	g_Idiomarina
	g_Lewinella		g_Enterobacter	f_Nitrincolaceae_sp2
	o_HOC36		g_KCM-B-112
	g_MBIC10086		f_PHOS-HE36
	g_Filomicrobium		g_Methylobacillus
	f_Pseudobdellovibrionaceae		g_Agrobacterium
	g_Pelagibius
	g_Fulvivirga
	g_Ilumatobacter
	g_Schizothrix_LEGE_07164
	f_Cyclobacteriaceae_sp1
	g_Silicimonas

## Sheet: Table S9
Module label	BW1	BW2	BW3	BW4	BW5
Taxa	g_Pikeienuella	p_NB1-j(unclassified)	g_Alteromonas	g_SM1A02	g_Corynebacterium
	f_OM182_clade	o_BD7-8(unclassified)	g_Halomonas	g_Chroococcidiopsis_PCC-6712	g_Sphingobium
	f_Flavobacteriaceae_sp2	c_BD2-11_terrestrial_group(unclassified)	g_Vibrio	g_Marinicella	g_Mycobacterium
	g_Ruegeria	g_OM27_clade	g_Algicola	f_Cellvibrionaceae_sp2	g_Acinetobacter
	f_Sandaracinaceae	g_Spirochaeta	g_Photobacterium	g_Reichenbachiella	f_Comamonadaceae
	f_DEV007	f_KI89A_clade	g_Pseudidiomarina	g_SKP-2	g_Caulobacter
	f_Oligoflexaceae_sp2	c_Pla3_lineage	g_Pseudoalteromonas	g_Parahaliea	g_Aquabacterium
	g_Coxiella	o_Thalassobaculales_sp2	g_Mesoflavibacter	g_Thalassobius	g_Cutibacterium
	f_Haliangiaceae_sp2	f_Kiloniellaceae_sp2	g_Oleibacter	g_Aquibacter	g_Asticcacaulis
	o_Chitinophagales_sp2	o_Cyanobacteriales_sp2	g_Psychrobacter	g_OM60(NOR5)_clade	g_Gordonia
	c_Gammaproteobacteria_sp1	g_Pseudotenacibaculum	g_Marinobacterium	g_Trichodesmium_IMS101	g_Pseudomonas
	g_Subgroup_10	g_Acanthopleuribacter	g_Roseivirga	g_Kordia	g_Massilia
	g_Acaryochloris_MBIC11017	g_C1-B045	g_Peredibacter	f_Cryomorphaceae_sp1	g_Methylobacterium
	f_Nannocystaceae_sp2	g_Kordiimonas	g_Marinomonas	g_Flammeovirga	g_Streptococcus
	g_Acrophormium_PCC-7375	f_BIrii41	g_Arcobacter	o_Bradymonadales_sp2	g_Devosia
	f_Hyphomonadaceae_sp2	g_Pseudohongiella	f_Alteromonadaceae_sp2	g_Flexithrix	g_Stenotrophomonas
	f_Rhizobiaceae_sp2	c_Alphaproteobacteria_sp2	g_Tenacibaculum	g_Cysteiniphilum	g_Comamonas
	g_Actibacterium	o_Ardenticatenales	g_Exiguobacterium	f_Stappiaceae_sp2	g_Staphylococcus
	f_Saprospiraceae_sp2	g_Ferrimonas	g_Thalassotalea	g_Microbulbifer	g_Acidovorax
	g_Muricauda	c_OM190	g_Terasakiella		g_Streptomyces
	g_Woeseia	g_Cm1-21	g_Marinobacter		g_Desulfosporosinus
	g_Rubritalea	f_Geminicoccaceae_sp2	o_JGI_0000069-P22		g_Brevundimonas
	f_Nitrosococcaceae	c_vadinHA49	g_Psychrosphaera		g_Pseudonocardia
	g_Phormidium_MBIC10003	g_Crocinitomix	g_Bacterioplanoides		o_Subgroup_7
	g_Arenicella	g_AqS1	g_Tritonibacter		f_A0839
	f_Micavibrionaceae	c_Gammaproteobacteria_sp2	g_Cobetia		g_Lawsonella
	c_Gracilibacteria	g_CSP1-2	g_Idiomarina		g_TM7a
	f_Rhizobiaceae_sp1	o_SAR202_clade	g_Bacterioplanes		g_Nocardiopsis
	f_Microtrichaceae_sp2	f_Methyloligellaceae	g_Sulfitobacter		g_Mesorhizobium
	g_Geminobacterium	f_A4b	g_Nonlabens		g_Sphingopyxis
	g_Roseibium	g_Urania-1B-19_marine_sediment_group	g_Mesonia		g_Micrococcus
	o_EC3	f_Magnetospiraceae_sp2	g_Thalassolituus		g_Delftia
	c_Eremiobacteria	o_pItb-vmat-80	g_Alishewanella		g_Roseateles
	f_Paracoccaceae_sp1	g_Candidatus_Nitrosoarchaeum	g_Sagittula		g_Roseomonas
	g_Portibacter	o_HOC36			g_Methylorubrum
	o_Hyphomicrobiales_sp2	g_Pseudovibrio			g_Elstera
	g_Lewinella	g_MBIC10086			g_Tsukamurella
	f_Cyclobacteriaceae_sp2	g_Vicingus			g_Agrobacterium
	g_Filomicrobium	f_Halieaceae_sp2
	f_Flavobacteriaceae_sp1	o_Actinomarinales
	f_Pseudobdellovibrionaceae	g_Pelagibius
	g_Granulosicoccus	c_Gammaproteobacteria_sp3
	g_Synechococcus_PCC-7336	o_Defluviicoccales
	g_Phormidesmis_ANT.LACV5.1	g_BD1-7_clade
	g_Roseovarius	g_Nitrospira
	g_Roseobacter_clade_CHAB-I-5_lineage	o_Pseudomonadales
	g_Ilumatobacter	o_Flavobacteriales
	g_Schizothrix_LEGE_07164	o_Candidatus_Kaiserbacteria
	g_Cohaesibacter	c_028H05-P-BN-P5
	g_Silicimonas	f_Cyclobacteriaceae_sp1
	g_Pseudahrensia	g_Thalassocola
	f_Amoebophilaceae	o_EPR3968-O8a-Bc78
	g_Psychrobium	g_Phaeodactylibacter
	f_Kiloniellaceae_sp1	f_Rhodothermaceae_sp2
	g_Aquimarina	g_Zeaxanthinibacter
	g_Propionigenium	c_bacteriap25
	f_Clostridiaceae_sp1	f_Parvularculaceae_sp2
	g_Limibaculum	c_Bacteroidia
	g_Cognatishimia	o_UBA10353_marine_group
	g_Truepera	g_Anderseniella
	g_Shimia	g_Bauldia
	f_Halieaceae_sp1	g_Rhizobium

## Sheet: Table S10
	Metabolic pathways	Biosynthesis of secondary metabolites	Microbial metabolism in diverse environments	Biosynthesis of amino acids	Carbon metabolism	ABC transporters	Two-component system	Ribosome	Purine metabolism	Quorum sensing	Oxidative phosphorylation	Pyruvate metabolism	Glyoxylate and dicarboxylate metabolism	Glycine, serine and threonine metabolism	Pyrimidine metabolism	Cysteine and methionine metabolism	Glycolysis / Gluconeogenesis	Carbon fixation pathways in prokaryotes	Fatty acid metabolism	2-Oxocarboxylic acid metabolism	Aminoacyl-tRNA biosynthesis	Flagellar assembly	Amino sugar and nucleotide sugar metabolism	Porphyrin and chlorophyll metabolism	Bacterial secretion system	Propanoate metabolism	Valine, leucine and isoleucine degradation	Butanoate metabolism	Bacterial chemotaxis	Biofilm formation - Vibrio cholerae
BW1	0.349343	-0.555889	0.567041	-0.22105	0.686393	1.15082	-0.753156	-0.446739	0.388241	1.05077	0.310508	-0.219712	1.33514	1.39561	-0.0660962	-0.500079	-0.439972	0.304041	0.257404	-0.45713	-0.364799	-0.57126	-0.482063	1.62414	-1.17049	-0.248816	1.27359	0.222965	-0.967186	-0.948438
BW2	-0.0858258	0.595667	-1.14711	0.838134	0.459816	-0.0244994	-0.573104	0.959528	0.170607	0.944791	0.926658	-0.114539	0.199752	-0.276507	0.950043	0.0327843	0.668076	0.958841	-0.077889	0.793663	1.07319	0.185811	0.64798	0.0461937	-0.573086	-1.18725	-1.14538	-0.728354	0.138844	-0.647244
BW3	-0.590162	-0.400348	-0.284905	-0.451842	-0.52289	-0.17413	0.984113	-0.488641	0.453389	-0.778226	-1.17556	1.15959	-1.21796	0.0166542	-0.0396271	0.289893	-0.386275	-0.651126	-0.749695	0.0497888	-0.778961	1.18409	0.614781	-1.01299	0.590483	1.40707	-0.698615	0.156158	1.1471	1.48815
BW4	1.69183	1.2452	-0.849592	0.929562	0.70484	-1.37487	-0.980314	1.07983	0.534646	-1.2692	0.159742	-0.880639	-0.667341	-0.381208	1.23817	1.68959	1.1408	0.931802	0.111005	0.831661	1.01879	-1.07803	0.884932	0.629897	-0.573637	-1.64679	-0.836614	-1.43091	-0.855333	-0.46212
BW5	-0.687168	-0.948663	1.3214	-1.31514	-1.50775	0.913508	1.13013	-1.25314	-1.58655	-0.0616915	-0.661313	1.19384	0.42577	-0.643134	-1.90325	-1.70823	-0.618701	-1.15476	0.600552	-1.79864	-1.23162	-0.823054	-1.30244	0.043889	1.60883	0.616435	1.20064	1.11827	-0.0877449	0.199617
MJ1	0.983498	1.43101	-0.00940866	0.979076	1.62835	-1.17669	-1.35662	0.96599	-0.391421	-0.804447	1.30257	-1.54297	0.136673	0.0803258	0.833066	0.488884	1.7934	0.880486	0.814226	0.415234	0.847515	-1.58465	0.518743	1.27055	-1.23774	-0.246953	0.472	-0.496071	-1.45455	-1.08156
MJ2	0.371141	1.02877	-1.2685	1.10417	0.622617	-0.922983	-0.827352	1.33985	0.374825	-0.103101	1.37387	-0.643269	-0.428046	-0.0682771	0.568328	0.688164	0.335883	1.36215	1.65619	1.22293	1.43792	-0.133816	0.599151	-1.5062	0.0243832	-0.478658	-0.491668	-0.999147	-0.876399	-0.319471
MJ3	-1.6733	-1.47242	1.14681	-1.70131	-1.33047	1.00805	0.930184	-1.34355	-1.75082	1.79017	0.0115965	-0.739907	1.25413	-1.69079	-1.3632	-1.32852	-1.68969	-1.37649	0.010832	-1.54995	-0.961617	0.830049	-1.03973	-0.0477985	0.956035	-0.231558	1.33019	1.93573	0.818131	0.152551
MJ4	-0.960162	-0.350005	-0.673754	-0.508311	-0.678789	-0.561807	1.20358	-0.548869	0.263329	-0.943434	-1.33477	1.36994	-1.69248	-0.293011	0.0275049	0.594557	-0.500986	-0.784949	-0.553831	0.10429	-0.908634	1.30988	1.13649	-1.02441	1.05895	1.20809	-1.09662	-0.0910958	1.34545	1.95133
MJ5	0.600798	-0.573334	1.19802	0.346715	-0.0621196	1.16259	0.242534	-0.264258	1.54376	0.174377	-0.913306	0.417661	0.65437	1.86034	-0.244944	-0.247046	-0.302533	-0.469997	-2.06879	0.388154	-0.131787	0.680986	-1.57784	-0.0232663	-0.683731	0.808426	-0.00752599	0.312457	0.791682	-0.332807
