# Supplementary material
Source: Research Square preprint supplement (doi:10.21203/rs.3.rs-8795967/v1)
Supplement: Supplementary file 2 [file 7e51e0df64c7070934125835.docx]

**Supplementary Information**

**Environmental heterogeneity shapes adaptive plasticity in symbiotic bacterial assemblages across diverse Acropora species**


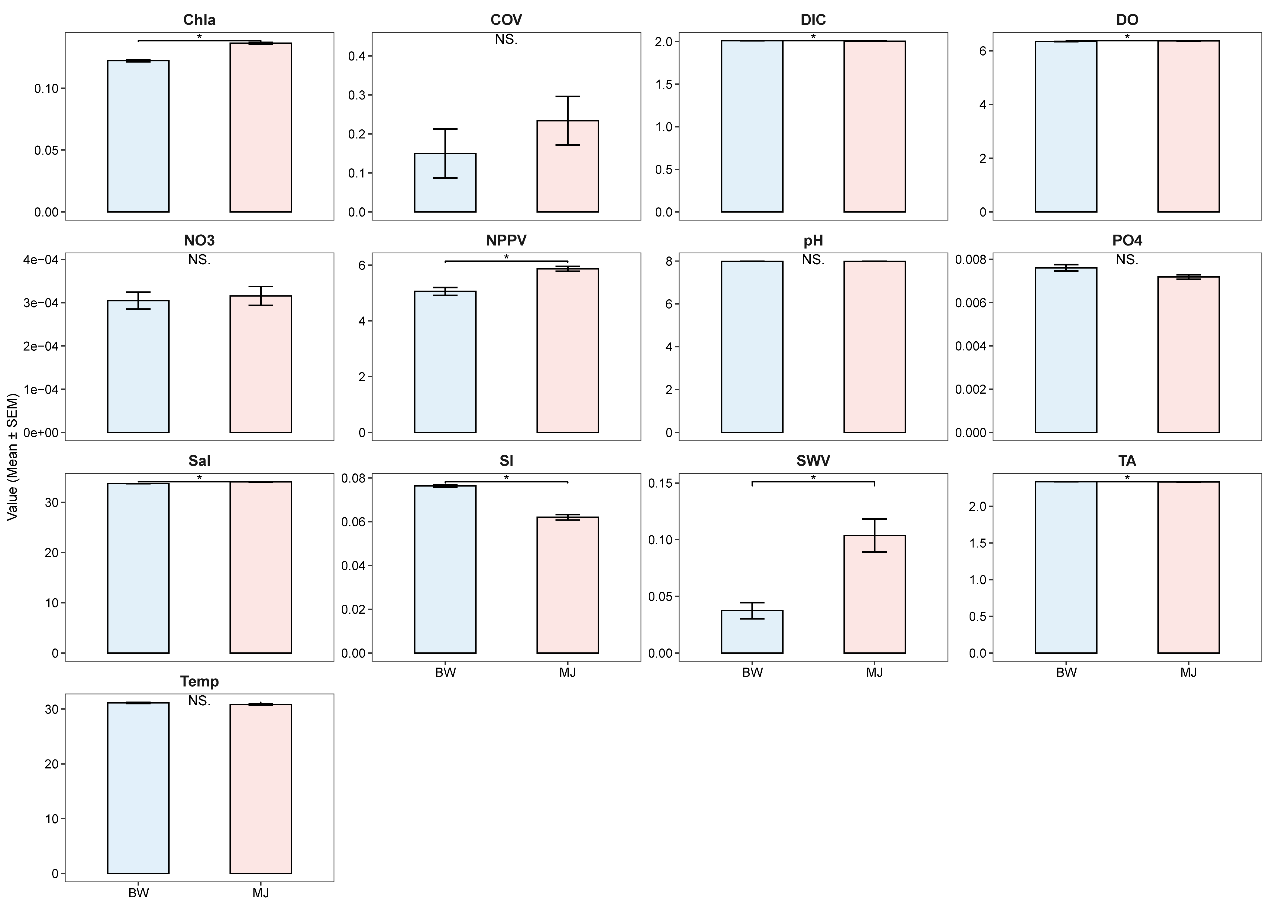


**Fig. S1** Differences in twelve environmental factors and scleractinian coral cover between the MJ and BW reef areas. Data are presented as mean ± SEM. Asterisks denote significant differences (*p* < 0.05, **p* < 0.01) based on Wilcoxon rank-sum tests.


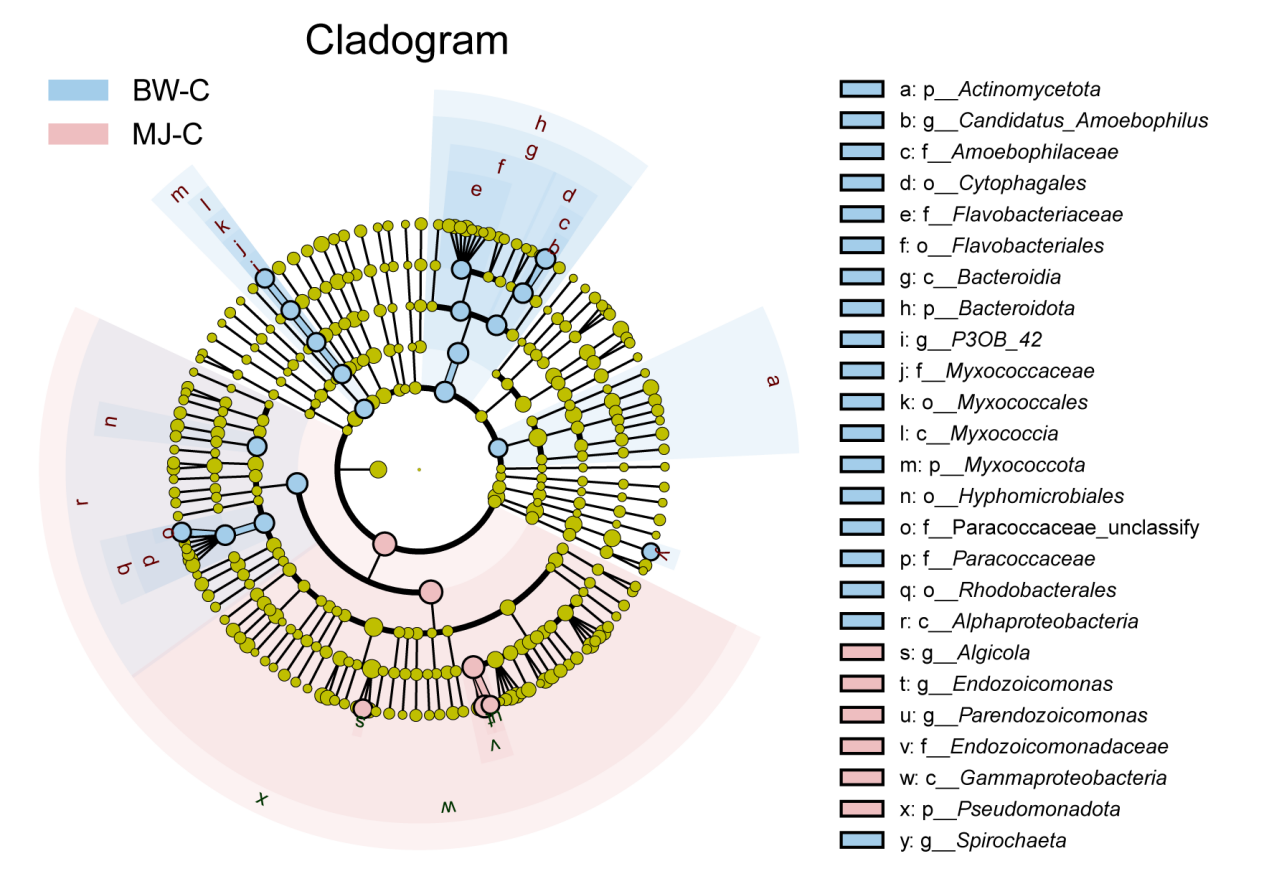


**Fig. S2** Phylogenetic tree of Lefse analysis results for coral microbiomes in the MJ and BW reef areas.


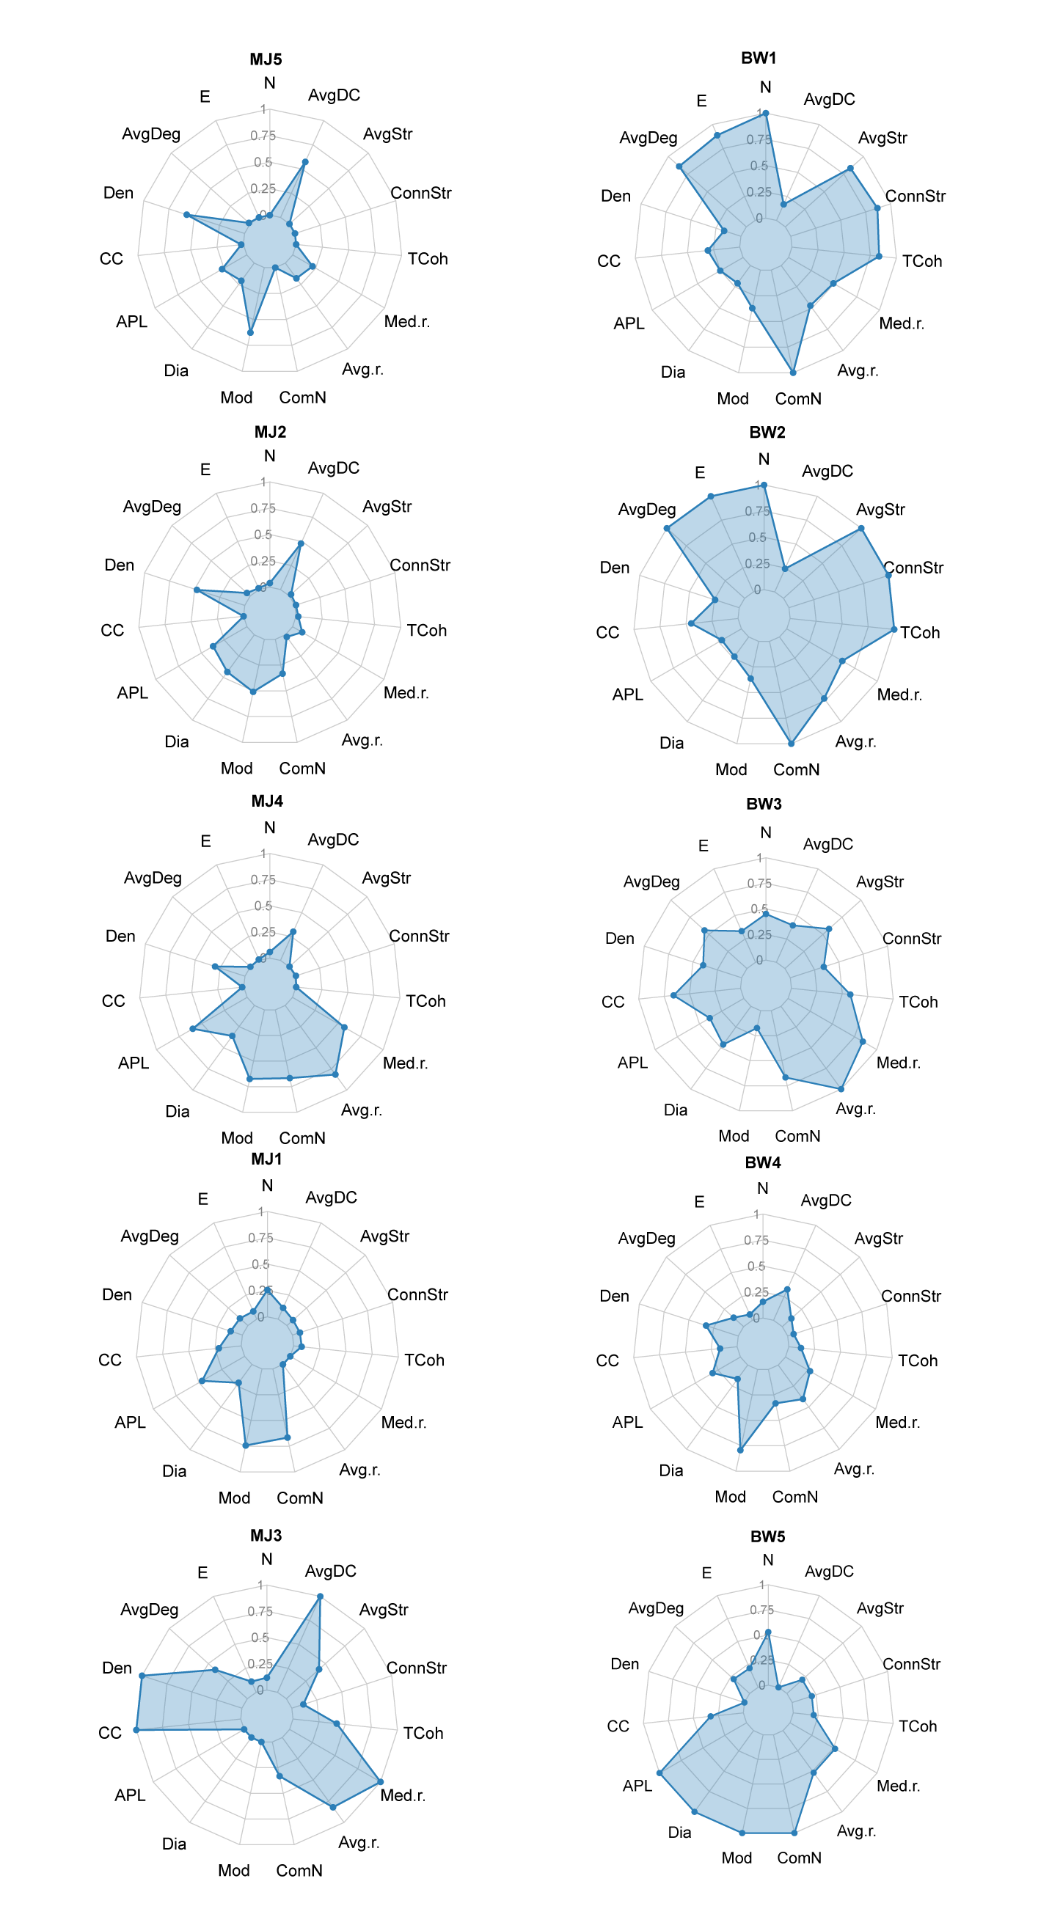


**Fig. S3** Radar chart showing the internal topological properties of modules containing more than 10 microbial taxa extracted from the collinearity networks of MJ (left) and BW (right) coral microbial communities. N denotes the number of nodes, E denotes the number of edges, AvgDeg denotes the average degree, Den denotes network density, CC denotes the clustering coefficient, APL denotes the average path length, Dia denotes network diameter, Avg.r. denotes the mean absolute correlation coefficient, Med.r. denotes the median absolute correlation coefficient, TCoh denotes total cohesion, ConnStr denotes connection strength, AvgStr denotes average node strength, and AvgDC denotes average degree centrality.


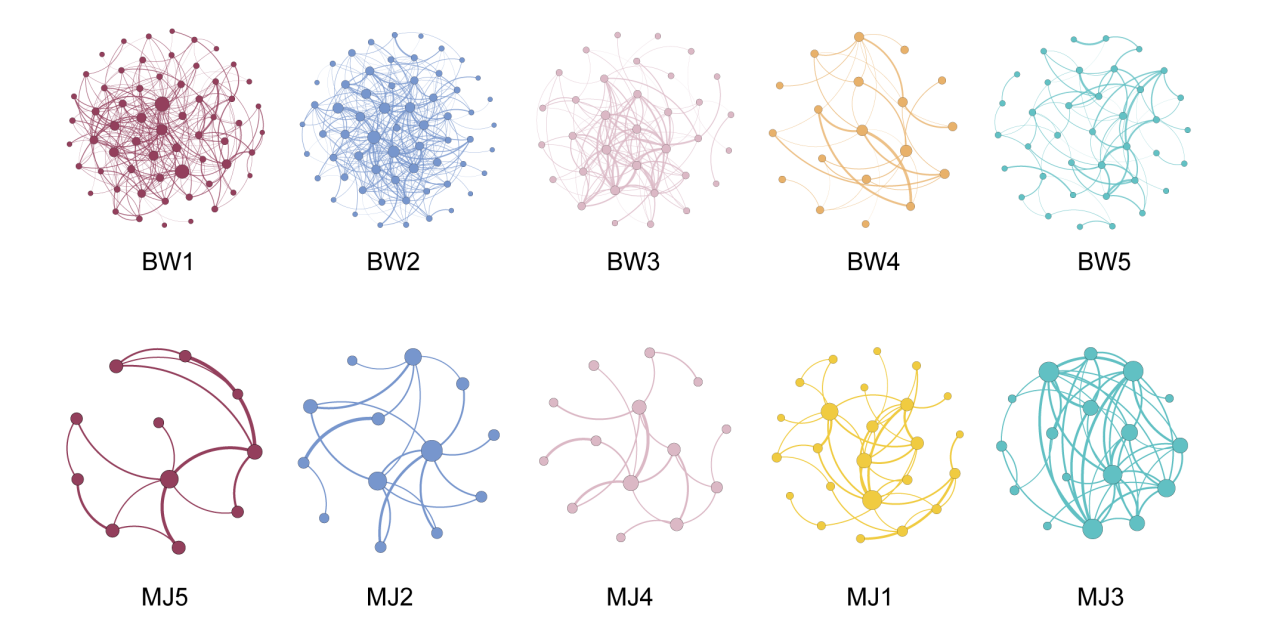


**Fig. S4** Modules containing more than 10 microbial taxa extracted from the collinearity networks of MJ (left) and BW (right) coral microbial communities, where identical node colors represent functionally similar modules. In the BW1–MJ5 pair, BW1 is characterized by a community structure dominated by typical marine heterotrophic and surface/particle-associated lineages (including multiple Alpha- and Gammaproteobacteria and Bacteroidota-related groups), whereas MJ5 contains a larger fraction of poorly classified marine clades and deep-water/sediment-associated lineages, indicating a shifted ecological background despite functional similarity. This pattern recurs across other paired modules: MJ2 and BW3 are enriched in fast-growing, opportunistic marine heterotrophs (e.g., *Alteromonas*- related, *Vibrio*- related, and *Pseudoalteromonas*-related taxa), while MJ4 incorporates phototrophic/biogeochemically relevant cyanobacterial members (e.g., *Trichodesmium*) together with putative polysaccharide-degrading and particle-attached bacteria. MJ1 was enriched in *Corynebacterium*, *Mycobacterium*, *Staphylococcus*, and *Streptococcus*, whereas its BW counterpart exhibited a more marine-affiliated, particle-associated taxonomic signature. (Table S8, S9).

**Table S1** Environmental Factors and Reef-Building Coral Cover Data of MJ Reef.

| Location | MJ3 | MJ4 | MJ5 | MJ6 | MJ2 |
| --- | --- | --- | --- | --- | --- |
| PO4 | 0.007344925 | 0.007130035 | 0.007285835 | 0.006801715 | 0.00735091 |
| SI | 0.0598192 | 0.0626472 | 0.0610316 | 0.0667464 | 0.0600068 |
| SWV | 0.14504 | 0.096003 | 0.061993 | 0.12607 | 0.089553 |
| NPPV | 5.9575 | 5.9212 | 5.8265 | 5.5597 | 6.0744 |
| DIC | 2.005 | 2.0057 | 2.0059 | 2.0057 | 2.0051 |
| TA | 2.3313 | 2.3324 | 2.3326 | 2.3323 | 2.3313 |
| DO | 6.37312 | 6.36384 | 6.36832 | 6.36672 | 6.37472 |
| NO3 | 0.000329952 | 0.00031243 | 0.000286291 | 0.000259991 | 0.000389503 |
| Chla | 0.13676 | 0.13759 | 0.13755 | 0.13617 | 0.134 |
| Temp | 30.603 | 31.061 | 30.893 | 31.033 | 30.616 |
| COV | 0.217 | 0.059 | 0.31 | 0.162 | 0.421 |
| Sal | 34.08 | 34.075 | 34.088 | 34.041 | 34.067 |
| pH | 7.9914 | 7.9873 | 7.9887 | 7.987 | 7.9928 |

**Table S2** Environmental Factors and Reef-Building Coral Cover Data of BW Reef.

| Location | BW1 | BW2 | BW3 |
| --- | --- | --- | --- |
| PO4 | 0.00760551 | 0.00734236 | 0.007858875 |
| SI | 0.076356 | 0.0773976 | 0.0753032 |
| SWV | 0.046198 | 0.023245 | 0.042514 |
| NPPV | 5.154 | 5.2427 | 4.7716 |
| DIC | 2.0102 | 2.0099 | 2.0103 |
| TA | 2.335 | 2.3352 | 2.3346 |
| DO | 6.34464 | 6.33856 | 6.34944 |
| NO3 | 0.000321792 | 0.000327112 | 0.000265844 |
| Chla | 0.12264 | 0.12363 | 0.12057 |
| Temp | 31.203 | 31.219 | 30.95 |
| COV | 0.0965 | 0.079 | 0.275 |
| Sal | 33.722 | 33.72 | 33.732 |
| pH | 7.9864 | 7.9848 | 7.9884 |

**Table S7** Table of topological properties of coral microbiome co-occurrence networks from two reef areas, MJ and BW. N is the number of nodes; E is the number of edges; Avg. Degree is the average degree; Density is the network density; Avg. Path Length is the average path length; Clust. Coef. is the clustering coefficient; Diameter is the network diameter; Modularity (Q) is the modularity; # Communities is the number of communities.

| Indicator | BW | MJ |
| --- | --- | --- |
| N | 321 | 259 |
| E | 1163 | 162 |
| Avg. Degree | 7.246 | 1.251 |
| Density | 0.02264 | 0.00485 |
| Avg. Path Length | 1.802 | 2.12 |
| Clust. Coef. | 0.364 | 0.448 |
| Diameter | 6.90945 | 6.01864 |
| Modularity (Q) | 0.446 | 0.735 |
| # Communities | 99 | 171 |
